# Supplementary material for: Natural Compounds for Bone Remodeling: A Computational and Experimental Approach Targeting Bone Metabolism-Related Proteins
Source: MDPI journal article supplement (doi:10.3390/ijms25095047), 2024-05-06
Supplement: s1 [file s1]

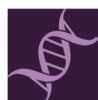

Article

# Natural Compounds for Bone Remodeling: A Computational and Experimental Approach Targeting Bone Metabolism-Related Proteins

Alexandros-Timotheos Loukas <sup>1,2,†</sup>, Michail Papadourakis <sup>2,\*,†</sup>, Vasilis Panagiotopoulos <sup>2,3</sup>, Apostolia Zampala <sup>2</sup>, Eleni Chontzopoulou <sup>2</sup>, Stephanos Christodoulou <sup>2</sup>, Theodora Katsila <sup>4</sup>, Panagiotis Zoumpoulakis <sup>1,4</sup> and Minos-Timotheos Matsoukas <sup>2,3,\*</sup>

<sup>1</sup> Department of Food Science and Technology, University of West Attica, Ag. Spyridonos, 12243 Egaleo, Greece

<sup>2</sup> Cloudpharm Private Company, Kifissias Avenue 44, 15125 Marousi, Greece

<sup>3</sup> Department of Biomedical Engineering, University of West Attica, Ag. Spyridonos, 12243 Egaleo, Greece

<sup>4</sup> Institute of Chemical Biology, National Hellenic Research Foundation, 11635 Athens, Greece

\* Correspondence: mpapadourakis@cloudpharm.eu (M.P.); mmatsoukas@uniwa.gr (M.-T.M.); Tel.: +30-538-5364 (M.P. & M.-T.M.)

† These authors contributed equally to this work.

## 2. Results

### 2.1. Selection of the most promising natural compounds for MD simulations

**Table S1.** Docking scores of the 187 natural compounds on p38b and ERK1

| Names                                            | Docking scores p38b<br>(kcal/mol) | Docking scores ERK1<br>(kcal/mol) |
|--------------------------------------------------|-----------------------------------|-----------------------------------|
| Pratensein                                       | -7.7                              | -8.8                              |
| 3'O-methylorobol                                 | -9.1                              | -8.6                              |
| 6,8-diprenylgenistein                            | -8.4                              | -10.2                             |
| Afzelin                                          | -8.1                              | -9.9                              |
| Kaempferitrin                                    | -9.3                              | -9.1                              |
| viscumneoside IX                                 | -9.4                              | -9.3                              |
| (-)-epicatechin                                  | -9.1                              | -8.4                              |
| (2S)-2'-methoxykurarinone                        | -7.8                              | -8.9                              |
| (7R,8S)-ceplignan                                | -8.4                              | -8.1                              |
| (7R,8S)-dehydrodiconiferyl al-<br>cohol          | -7.3                              | -8.0                              |
| (7R,8S)-ficusal                                  | -6.8                              | -6.7                              |
| (S)-naringenin 7-O-beta-D-<br>glucoside / Prunin | -8.7                              | -9.2                              |
| 1,2-dihydroxy-3-<br>methylantraquinone           | -8.3                              | -8.9                              |

|                                                                   |      |       |
|-------------------------------------------------------------------|------|-------|
| 1,3,8-trihydroxy-2-methoxyanthraquinone                           | -7.8 | -8.5  |
| 15,16-dihydrotanshinone I                                         | -9.5 | -10.0 |
| 2,3,5,4'-Tetrahydroxystilbene-2-O- $\beta$ -D-glucoside (TSG)     | -7.1 | -7.9  |
| 20(S)-ginsenoside Rh2                                             | -8.9 | -8.2  |
| 2-hydroxy-1-methoxy-anthraquinone                                 | -7.9 | -8.5  |
| 2-methoxyanthraquinone                                            | -8.3 | -8.4  |
| 3-methoxynobiletin                                                | -7.2 | -7.5  |
| 3-O-beta-D-glucopyranosyl-7-O-alpha-L-arabinofuranosyl-kaempferol | -8.8 | -8.4  |
| 5-hydroxymethyl-2-furaldehyde                                     | -4.8 | -4.5  |
| 6-prenylgenistein                                                 | -9.0 | -9.2  |
| 7-O-methyl-luteone                                                | -8.3 | -8.7  |
| 8-hydroxy-2,6-dimethyl-2-octenoic acid                            | -6.3 | -6.1  |
| 8-prenylgenistein                                                 | -9.6 | -9.8  |
| 8-prenylkaempferol                                                | -8.9 | -9.0  |
| Acerogenin A                                                      | -9.3 | -9.0  |
| Acteoside                                                         | -8.8 | -10.1 |
| Albiflorin                                                        | -8.7 | -9.1  |
| Apigenin                                                          | -9.2 | -8.5  |
| Apocynin                                                          | -6.1 | -5.9  |
| Apomorphine Hydrochloride                                         | -8.4 | -9.5  |
| Asperosaponin VI                                                  | -9.2 | -8.6  |
| Astragalin                                                        | -8.1 | -8.6  |
| Aucubin                                                           | -7.7 | -7.3  |
| aureusidin                                                        | -9.4 | -8.6  |
| avenacoside B                                                     | -6.1 | -7.4  |
| Bacoside A                                                        | -8.2 | -8.0  |
| Bakuchiol                                                         | -8.3 | -8.4  |

|                               |       |       |
|-------------------------------|-------|-------|
| Baohuoside-I                  | -8.7  | -9.6  |
| Bavachalcone                  | -9.2  | -9.3  |
| bavachin                      | -9.9  | -9.7  |
| b-carotene                    | -11.9 | -9.1  |
| Berberine                     | -9.5  | -8.9  |
| Bergapten                     | -7.3  | -7.2  |
| Betulin-3beta-yl-caffeate     | -8.9  | -10.5 |
| Betulinic acid                | -8.3  | -9.0  |
| Cajanin                       | -8.9  | -8.5  |
| Catalpol                      | -8.0  | -7.8  |
| chlorogenic acid              | -8.4  | -8.4  |
| Cholecalciferol               | -10.8 | -9.1  |
| cimicidanol-3-O-beta-xyloside | -7.7  | -8.3  |
| Cimicidol-3-O-beta-xyloside   | -7.9  | -9.4  |
| Cordycepin                    | -6.9  | -7.0  |
| Corylin                       | -10.8 | -9.2  |
| Costunolide                   | -7.9  | -8.1  |
| cryptotanshinone              | -9.6  | -10.0 |
| cyanidin-3-O-glucoside        | -8.1  | -9.0  |
| cyanidin-3-O-rutinoside       | -9.5  | -9.9  |
| Cyanocobalamin                | -8.0  | -7.1  |
| Daidzein                      | -9.0  | -8.6  |
| delphinidin-3-O-glucoside     | -8.8  | -9.4  |
| Delphinidin-3-rutinoside      | -10.2 | -9.9  |
| delta-tocotrienol             | -10.2 | -10.5 |
| Deoxyactein                   | -10.3 | -8.4  |
| Dioscin                       | -7.3  | -8.9  |
| Diosgenin                     | -9.5  | -10.1 |
| Diosmetin                     | -9.3  | -8.7  |
| Diospongin B                  | -9.3  | -9.2  |
| Docosahexaenoic Acids         | -8.0  | -7.3  |
| Echinacoside                  | -8.7  | -9.2  |
| Echinocystic acid             | -9.2  | -7.7  |
| EGCG                          | -8.9  | -9.5  |
| eicosapentaenoic acid         | -7.5  | -7.7  |
| Emodin                        | -8.1  | -8.9  |
| Epimedin B                    | -7.6  | -8.8  |
| Epimedin C                    | -7.9  | -8.6  |
| Equol                         | -9.4  | -8.3  |
| Ergocalciferol                | -10.3 | -9.3  |
| Estrogen                      | -11.5 | -8.8  |

|                                                  |       |      |
|--------------------------------------------------|-------|------|
| Estrogens, Conjugated                            | -10.0 | -9.2 |
| Ferulic acid                                     | -6.7  | -6.3 |
| Ferutinin                                        | -8.0  | -9.0 |
| Folic Acid                                       | -9.7  | -9.5 |
| Formononetin                                     | -8.9  | -8.5 |
| Gastrodin                                        | -7.4  | -6.9 |
| Genipin                                          | -6.8  | -6.3 |
| Geniposide                                       | -7.1  | -7.7 |
| Geniposidic acid                                 | -7.1  | -7.4 |
| Genistein                                        | -9.0  | -8.7 |
| Ginsenoside Rb1                                  | -7.7  | -7.7 |
| Ginsenoside Rd                                   | -8.1  | -8.7 |
| Ginsenoside Rg1                                  | -8.3  | -9.0 |
| Ginsenoside Rg3                                  | -6.9  | -8.5 |
| Ginsenoside Rb2                                  | -8.4  | -6.9 |
| Glycyrrhizic acid                                | -8.2  | -9.0 |
| Hesperidin                                       | -9.2  | -9.9 |
| Honokiol                                         | -8.8  | -8.1 |
| Hydroxytyrosol                                   | -6.1  | -6.1 |
| Hymenialdisine                                   | -8.4  | -9.0 |
| Icariin                                          | -7.9  | -9.5 |
| Icaritin                                         | -8.5  | -8.7 |
| Ikariside A                                      | -8.6  | -9.9 |
| Imperatorin                                      | -7.8  | -8.3 |
| Isoformononetin                                  | -8.9  | -8.6 |
| Isoliquiritigenin                                | -8.9  | -8.2 |
| isopsoralen, Angelicin                           | -7.9  | -7.5 |
| isoswertisin-2''-O-rhamnoside                    | -8    | -9.4 |
| isovitexin-2''-O-arabinoside                     | -8.7  | -8.9 |
| kaempferol                                       | -9.4  | -8.5 |
| Kireanol                                         | -8.2  | -7.4 |
| Kobophenol A                                     | -5.0  | -7.7 |
| Kurarinone                                       | -8.6  | -9.6 |
| kushenol F                                       | -8.8  | -9.5 |
| Laburnetin                                       | -8.8  | -9.0 |
| Ligustroside                                     | -8.2  | -8.2 |
| Linolenic acid                                   | -6.7  | -7.1 |
| loganin                                          | -7.6  | -7.6 |
| Luteolin                                         | -9.2  | -8.8 |
| luteolin 7-O-beta-D-neohesperidoside / Lonicerin | -9.2  | -9.1 |



|                                 |       |       |
|---------------------------------|-------|-------|
| Luteone                         | -9.4  | -8.7  |
| Lyciumin A                      | -8.0  | -9.6  |
| Lyciumin B                      | -7.1  | -8.9  |
| Lyciumoside III                 | -9.0  | -8.7  |
| maltol glucoside                | -7.5  | -6.7  |
| Maohuoside A                    | -8.0  | -9.3  |
| matairesinol                    | -8.9  | -7.9  |
| Melatonin                       | -7.6  | -7.2  |
| Naringenin                      | -8.9  | -8.4  |
| Naringin                        | -10.0 | -9.1  |
| Neobavaisoflavone               | -9.9  | -10.0 |
| Neoeriocitrin                   | -10.1 | -9.4  |
| nu(e)zhenide                    | -8.1  | -8.5  |
| Oleanolic acid                  | -9.0  | -8.4  |
| Oleanolic acid acetate          | -10.1 | -8.1  |
| oleoside dimethyl ester         | -7.1  | -7.1  |
| Oleuropein                      | -8.6  | -8.6  |
| Ophiopogonin D                  | -7.5  | -9.1  |
| Osthole                         | -7.8  | -7.7  |
| palmitic acid                   | -6.0  | -6.3  |
| phloretin                       | -8.2  | -8.2  |
| Phloridzin                      | -8.5  | -8.7  |
| physicion                       | -8.3  | -9.1  |
| pinoresinol                     | -9.3  | -8.4  |
| Pinoresinol diglucoside         | -8.0  | -8.3  |
| Piperitol                       | -10.4 | -9.3  |
| Podocarnone                     | -9.9  | -9.3  |
| Poncirin                        | -8.9  | -8.6  |
| Psoralen                        | -7.8  | -7.4  |
| Psoralidin                      | -9.7  | -9.8  |
| Puerarin                        | -8.3  | -8.5  |
| Quercetin                       | -8.3  | -8.5  |
| quercetin-7-O-D-glucopyranoside | -9.3  | -9.0  |
| Resveratrol                     | -8.6  | -8.1  |
| Rubiadin                        | -8.2  | -8.8  |
| Rubiadin-1-methyl ether         | -8.2  | -8.7  |
| Rutin                           | -8.7  | -9.9  |
| Sagittatoside A                 | -8.5  | -8.0  |
| Salidroside                     | -7.7  | -7.3  |
| Salvianic acid A                | -10.2 | -9.6  |

|                    |       |       |
|--------------------|-------|-------|
| Salvianic acid B   | -8.1  | -8.1  |
| Salvianolic acid B | -9.3  | -7.7  |
| Samwinol           | -8.3  | -9.0  |
| Schisandrin A      | -6.1  | -7.0  |
| scopoletin         | -7.0  | -6.8  |
| sesaminone         | -9.2  | -9.2  |
| sophoraflavanone G | -8.1  | -8.7  |
| Sophoricoside      | -9.1  | -10.2 |
| Stachydrine        | -4.8  | -4.6  |
| Sulforaphane       | -4.2  | -4.2  |
| Sweroside          | -7.4  | -8.0  |
| syringaresinol     | -8.5  | -7.9  |
| Syringic acid      | -5.2  | -6.1  |
| tanshinone I       | -9.3  | -10.1 |
| Tanshinone IIA     | -10.0 | -10.2 |
| tanshinone VI      | -8.9  | -9.3  |
| Taxifolin          | -9.0  | -8.5  |
| Tilianin           | -9.9  | -9.7  |
| Tyrosol            | -5.6  | -5.4  |
| Ugonin K           | -9.5  | -9.8  |
| Ursolic acid       | -8.9  | -8.2  |
| Vanillic acid      | -5.9  | -5.8  |
| viscumneoside I    | -10.0 | -8.7  |
| Wedelolactone      | -8.4  | -9.0  |
| Wighteone          | -9.7  | -9.3  |
| Xanthogalenol      | -8.8  | -9.1  |

**Table S2.** Natural compounds that have been assessed by the EFSA organization.

| Compound | EFSA Scientific Opinion                                                                                          | EFSA panel conclusions                                                                                                                                                                                                                                 | EFSA scientific opinion reference |
|----------|------------------------------------------------------------------------------------------------------------------|--------------------------------------------------------------------------------------------------------------------------------------------------------------------------------------------------------------------------------------------------------|-----------------------------------|
| Naringin | Scientific Opinion on the safety and efficacy of naringin when used as a sensory additive for all animal species | <p>The FEEDAP Panel confirms that the use of naringin under the current authorised conditions of use is safe for the target species, the consumers, and the environment.</p> <p>Naringin does not cause severe irritation or corrosion to eyes, is</p> | [1], [2]                          |

|                |                                                                                                                                                                                                                                                                                       |                                                                                                                                                                                                                                                                                                                                                                                                                                                                                                                                                                                                                                                                                                                                           |     |
|----------------|---------------------------------------------------------------------------------------------------------------------------------------------------------------------------------------------------------------------------------------------------------------------------------------|-------------------------------------------------------------------------------------------------------------------------------------------------------------------------------------------------------------------------------------------------------------------------------------------------------------------------------------------------------------------------------------------------------------------------------------------------------------------------------------------------------------------------------------------------------------------------------------------------------------------------------------------------------------------------------------------------------------------------------------------|-----|
|                |                                                                                                                                                                                                                                                                                       | not irritant to the skin and is not classified as a dermal sensitiser.                                                                                                                                                                                                                                                                                                                                                                                                                                                                                                                                                                                                                                                                    |     |
| Cyanocobalamin | Safety of vitamin B12 (in the form of cyanocobalamin) produced by Ensifer adhaerens CNCM-I 5541 for all animal species, Scientific Opinion on Dietary Reference Values for cobalamin (vitamin B12)                                                                                    | The FEEDAP Panel concluded that cyanocobalamin produced by fermentation with E. adhaerens CNCM-I 5541 is considered safe for all animal species. The use of cyanocobalamin in animal nutrition is of no concern for consumer safety. Cyanocobalamin is non-irritant to skin and non-irritant to eyes. No conclusions could be drawn on the potential of the additive to be a skin sensitiser. The potential endotoxin activity of the additive is unlikely to represent a hazard for users. The use of the additive under assessment in animal nutrition is considered safe for the environment. Cyanocobalamin produced by E. adhaerens CNCM-I 5541 is effective in meeting animal's nutritional requirements when administered via feed | [3] |
| Rutin          | Scientific Opinion on the substantiation of health claims related to rutin and improvement of endothelium-dependent vasodilation (ID 1649, 1783) and protection of DNA, proteins and lipids from oxidative damage (ID 1784) pursuant to Article 13(1) of Regulation (EC) No 1924/2006 | The food constituent that is the subject of the health claims is rutin. The Panel considers that rutin is sufficiently characterised                                                                                                                                                                                                                                                                                                                                                                                                                                                                                                                                                                                                      | [4] |
| Resveratrol    | Safety of synthetic trans-resveratrol as a novel food pursuant to Regulation (EC) No 258/97                                                                                                                                                                                           | The Panel concludes that the novel food, synthetic trans-resveratrol, is safe under the proposed conditions of use                                                                                                                                                                                                                                                                                                                                                                                                                                                                                                                                                                                                                        | [5] |
| Folic Acid     | Scientific Opinion on Dietary Reference Values for folate                                                                                                                                                                                                                             | For adults, the Average Requirement (AR) is determined from the folate intake required to maintain folate adequacy characterized                                                                                                                                                                                                                                                                                                                                                                                                                                                                                                                                                                                                          | [6] |

|                                              |                                                                                                                                                                                                                                                                                                                                                                                                                                                                                      |                                                                                                                                                                                                                                                                                                                                                                                                                                                                                                                                                                                       |               |
|----------------------------------------------|--------------------------------------------------------------------------------------------------------------------------------------------------------------------------------------------------------------------------------------------------------------------------------------------------------------------------------------------------------------------------------------------------------------------------------------------------------------------------------------|---------------------------------------------------------------------------------------------------------------------------------------------------------------------------------------------------------------------------------------------------------------------------------------------------------------------------------------------------------------------------------------------------------------------------------------------------------------------------------------------------------------------------------------------------------------------------------------|---------------|
|                                              |                                                                                                                                                                                                                                                                                                                                                                                                                                                                                      | by serum and red blood cell folate concentrations of $\geq 10$ and 340 nmol/L, respectively                                                                                                                                                                                                                                                                                                                                                                                                                                                                                           |               |
| Hesperidin                                   | <p>Scientific Opinion on the substantiation of a health claim related to a combination of diosmin, troxerutin and hesperidin and maintenance of normal venous tone pursuant to Article 13(5) of Regulation (EC) No 1924/2006,</p> <p>Safety and efficacy of a feed additive consisting of an aqueous extract of Citrus limon (L.) Osbeck (lemon extract) for use in all animal species (Nor-Feed SAS). Reevaluation of neohesperidine dihydrochalcone (E 959) as a food additive</p> | <p>A cause and effect relationship has not been established between the consumption of a combination of diosmin, troxerutin and hesperidin and the maintenance of normal venous tone.</p> <p>No concerns for consumers were identified following the use of lemon extract up to the highest safe level in feed. The additive should be considered a skin and eye irritant, and a potential corrosive. The Panel concluded that dietary exposure to the food additive neohesperidine dihydrochalcone (E 959) at the reported uses and use levels would not raise a safety concern.</p> | [7], [8], [9] |
| EGCG, (-)-epicatechin                        | Scientific opinion on the safety of green tea catechins                                                                                                                                                                                                                                                                                                                                                                                                                              | Based on the available data on the potential adverse effects of green tea catechins on the liver, the Panel concluded that there is evidence from interventional clinical trials that intake of doses equal or above 800 mg EGCG/day taken as a food supplement has been shown to induce a statistically significant increase of serum transaminases in treated subjects compared to control.                                                                                                                                                                                         | [10]          |
| Eicosapentaenoic acid, Docosahexaenoic Acids | Scientific Opinion on the Tolerable Upper Intake Level of eicosapentaenoic acid (EPA), docosahexaenoic acid (DHA) and docosapentaenoic acid (DPA)                                                                                                                                                                                                                                                                                                                                    | Supplemental intakes of EPA and DHA combined at doses up to 5g/day, and supplemental intakes of EPA alone up to 1.8 g/day, do not raise safety concerns for adults. Dietary recommendations for EPA and DHA based on cardiovascular risk considerations for European                                                                                                                                                                                                                                                                                                                  | [11]          |

|                   |                                                                                                                                                                                                          |                                                                                                                                                                                                                                                                                                                                                                            |          |
|-------------------|----------------------------------------------------------------------------------------------------------------------------------------------------------------------------------------------------------|----------------------------------------------------------------------------------------------------------------------------------------------------------------------------------------------------------------------------------------------------------------------------------------------------------------------------------------------------------------------------|----------|
|                   |                                                                                                                                                                                                          | adults are between 250 and 500 mg/day. Supplemental intakes of DHA alone up to about 1g/day do not raise safety concerns for the general population. No data are available for DPA when consumed alone. In the majority of the human studies considered, fish oils, also containing DPA in generally unknown (but relatively low) amounts, were the source of EPA and DHA. |          |
| Linolenic acid    | Scientific Opinion on the substantiation of a health claim related to alpha linolenic acid and contribution to brain and nerve tissue development pursuant to Article 14 of Regulation (EC) No 1924/2006 | A cause and effect relationship has been established between the dietary intake of alpha-linolenic acid and contribution to brain and nerve tissue development                                                                                                                                                                                                             | [12]     |
| Naringenin        | Assessment of the feed additive consisting of naringin for all animal species for the renewal of its authorisation (HealthTech Bio Actives, S.L.U. (HTBA))                                               | The FEEDAP Panel cannot conclude on the possible respiratory sensitisation of the additive, due to the lack of data. There was no need for assessing the efficacy of the additive in the context of the renewal of the authorisation.                                                                                                                                      | [2]      |
| $\beta$ -carotene | Statement on the safety of $\beta$ -carotene use in heavy smokers                                                                                                                                        | The Panel concluded that exposure to $\beta$ -carotene from its use as food additive and as food supplement at a level below 15 mg/day do not give rise to concerns about adverse health effects in the general population, including heavy smokers.                                                                                                                       | [13]     |
| Diosmetin         | Scientific Opinion on the substantiation of a health claim related to a combination of diosmin, troxerutin and hesperidin and maintenance of normal venous tone pursuant to Article                      | A cause and effect relationship has not been established between the consumption of a combination of diosmin, troxerutin and hesperidin and the maintenance of normal venous tone. No concerns for consumers were identified following the use of lemon                                                                                                                    | [7], [8] |

|                         |                                                                                                                                                                                                                                                          |                                                                                                                                                                                                                                                                                                                                                                                                                                                                                                                                                                                                                                                                                              |            |
|-------------------------|----------------------------------------------------------------------------------------------------------------------------------------------------------------------------------------------------------------------------------------------------------|----------------------------------------------------------------------------------------------------------------------------------------------------------------------------------------------------------------------------------------------------------------------------------------------------------------------------------------------------------------------------------------------------------------------------------------------------------------------------------------------------------------------------------------------------------------------------------------------------------------------------------------------------------------------------------------------|------------|
|                         | <p>13(5) of Regulation (EC) No 1924/2006,</p> <p>Safety and efficacy of a feed additive consisting of a flavonoid-rich dried extract of Citrus × aurantium L. fruit (bitter orange extract) for use in all animal species (FEFANA asbl)</p>              | <p>extract up to the highest safe level in feed.</p> <p>The additive should be considered a skin and eye irritant, and a potential corrosive. The Panel concluded that dietary exposure to the food additive neohesperidinedihydrochalcone (E 959) at the reported uses and use levels would not raise a safety concern. The use in water for drinking is safe provided that the total daily intake of the additive does not exceed the daily amount that is considered safe when consumed via feed, except dog, cat and ornamental fish. No concerns for consumer safety were identified following the use of the additive up to the highest safe level in feed for the target animals.</p> |            |
| Hydroxytyrosol, Tyrosol | <p>Safety of hydroxytyrosol as a novel food pursuant to Regulation (EC) No 258/97,</p> <p>The EFSA Health Claim on Olive Oil Polyphenols: Acid Hydrolysis Validation and Total Hydroxytyrosol and Tyrosol Determination in Italian Virgin Olive Oils</p> | <p>The novel food, hydroxytyrosol, is safe under the proposed uses and use levels. The content of oleuropein and ligstroside derivatives in extra virgin olive oils (EVOOs) was indirectly evaluated comparing the number of phenols before and after hydrolysis. After acidic hydrolysis, a high content of total tyrosol was found in most of the EVOOs. The use of a suitable corrective factor for the evaluation of hydroxytyrosol allows an accurate determination only using pure tyrosol as a standard.</p>                                                                                                                                                                          | [14], [15] |
| Oleuropein              | <p>Scientific Opinion on the substantiation of a health claim related to olive (Olea europaea L.) leaf water extract and increase in glucose tolerance pursuant to Article 13(5) of Regulation (EC) No 1924/2006</p>                                     | <p>The scientific evidence is insufficient to establish a cause and effect relationship between the consumption of olive leaf water extract and an increase in glucose tolerance.</p>                                                                                                                                                                                                                                                                                                                                                                                                                                                                                                        | [16]       |
| Sulforaphane            | <p>Scientific Opinion Part I on the substantiation of</p>                                                                                                                                                                                                | <p>The claimed effects are “cardiovascular health”, “excellent source of</p>                                                                                                                                                                                                                                                                                                                                                                                                                                                                                                                                                                                                                 | [17]       |

|  |                                                                                                                                                                                                                                                                                                                                                                                                                                        |                                                                                                                                                                                                                                                                                                                                                                                                                                                                                         |  |
|--|----------------------------------------------------------------------------------------------------------------------------------------------------------------------------------------------------------------------------------------------------------------------------------------------------------------------------------------------------------------------------------------------------------------------------------------|-----------------------------------------------------------------------------------------------------------------------------------------------------------------------------------------------------------------------------------------------------------------------------------------------------------------------------------------------------------------------------------------------------------------------------------------------------------------------------------------|--|
|  | health claims related to various food(s)/food constituent(s) not supported by pertinent human data (ID 411, 559, 1174, 1184, 1197, 1380, 1409, 1656, 1667, 1670, 1763, 1767, 1806, 1884, 1908, 1997, 2141, 2159, 2243, 2244, 2325, 2331, 2333, 2336, 2652, 2717, 2727, 2752, 2788, 2861, 2870, 2885, 2894, 3077, 3101, 3516, 3595, 3726, 4252, 4288, 4290, 4406, 4509, 4709) pursuant to Article 13(1) of Regulation (EC) No 1924/2006 | sulforaphane known to help in the management of heart health”, and “help restoration of myocardial tissue”. The Panel assumes that the target population is the general population.<br>In the context of the proposed wordings and the clarifications provided by Member States, the Panel assumes that the claimed effects relate to the maintenance of normal cardiac function. The Panel considers that maintenance of normal cardiac function is a beneficial physiological effect. |  |
|--|----------------------------------------------------------------------------------------------------------------------------------------------------------------------------------------------------------------------------------------------------------------------------------------------------------------------------------------------------------------------------------------------------------------------------------------|-----------------------------------------------------------------------------------------------------------------------------------------------------------------------------------------------------------------------------------------------------------------------------------------------------------------------------------------------------------------------------------------------------------------------------------------------------------------------------------------|--|

Table S3. Clinical studies investigating the effects of phytochemicals or formulations on bone health.

| Component                                          | Disorder                                               | Type of Intervention                     | Intervention / treatment                                                                                                                                                                                                                                                                          | Conclusions                                                                                                                                                                               | ClinicalTrials.gov Identifier |
|----------------------------------------------------|--------------------------------------------------------|------------------------------------------|---------------------------------------------------------------------------------------------------------------------------------------------------------------------------------------------------------------------------------------------------------------------------------------------------|-------------------------------------------------------------------------------------------------------------------------------------------------------------------------------------------|-------------------------------|
| Tart cherries (rich in phenolics and anthocyanins) | Osteoporosis, Postmenopausal Osteoporosis, Age Related | Randomized, double-blind crossover trial | <p>Duration: 90 days<br/>Participants: 33 healthy women aged 65 -80 years</p> <p>Dietary Supplement: tart cherry juice concentrate is a commercial product provided by King Orchards (Central Lake, MI)</p> <p>Group A: 240 ml per day for 45 days<br/>Group B: 240ml twice daily for 45 days</p> | Short-term supplementation with the higher dose of tart cherry juice decreased bone resorption from baseline without altering bone formation and turnover biomarkers in this cohort [18]. | NCT04167150                   |

|                                   |                                                                |                                                    |                                                                                                                                                                                                                                                                                                                                                   |                                                                                                                                                                                          |             |
|-----------------------------------|----------------------------------------------------------------|----------------------------------------------------|---------------------------------------------------------------------------------------------------------------------------------------------------------------------------------------------------------------------------------------------------------------------------------------------------------------------------------------------------|------------------------------------------------------------------------------------------------------------------------------------------------------------------------------------------|-------------|
|                                   |                                                                |                                                    | Wash out period and then exchange the arms' treatments                                                                                                                                                                                                                                                                                            |                                                                                                                                                                                          |             |
| Resveratrol                       | Obesity<br>Inflammation<br>Insulin Sensitivity<br>Osteoporosis | Randomized, double-blind, Placebo-Controlled Trial | <p>Duration: 16 weeks</p> <p>Participants: 74 middle-aged obese men with MetS recruited from the general community, of which 66 completed all visits</p> <p>Dietary Supplement: Resveratrol (RSV)</p> <p>Group A: Placebo twice daily</p> <p>Group B: RSV<sub>high</sub> 500mg twice daily</p> <p>Group C: RSV<sub>low</sub> 75mg twice daily</p> | High-dose RSV supplementation positively affects bone, primarily by stimulating formation or mineralization [19].                                                                        | NCT01412645 |
| b-cryptoxanthin plus phytosterols | Hypercholesterolemia<br>Osteoporosis                           | Randomized, double-blind crossover trial           | <p>Duration: 12 weeks</p> <p>Participants: 38 postmenopausal women</p> <p>Group A: b-cryptoxanthin plus phytosterols</p> <p>Group B: placebo</p>                                                                                                                                                                                                  | The intake of this beverage could contribute to reduce the risk of cardiovascular diseases also obtaining a beneficial effect on serum inflammatory status in postmenopausal women [20]. | NCT02065024 |
| Dried Plum (phenolic compounds)   | Postmenopausal Osteoporosis                                    | Randomized controlled trial                        | <p>Duration: 52 weeks</p> <p>Participants: 332</p> <p>Group A: Dried Plum (50 or 100mg)</p> <p>Group B: Calcium supplement</p> <p>Group C: Vitamin D supplement</p>                                                                                                                                                                               | A 50 g dose of daily dose of prunes can prevent loss of total hip BMD in postmenopausal women, without increased fat mass seen with                                                      | NCT02822378 |



|                                                                                                               |                                                     |                                          |                                                                                                                                                                                                                                |                                                                                                                                                                                          |             |
|---------------------------------------------------------------------------------------------------------------|-----------------------------------------------------|------------------------------------------|--------------------------------------------------------------------------------------------------------------------------------------------------------------------------------------------------------------------------------|------------------------------------------------------------------------------------------------------------------------------------------------------------------------------------------|-------------|
|                                                                                                               |                                                     |                                          |                                                                                                                                                                                                                                | the larger dose [21].                                                                                                                                                                    |             |
| Blueberry<br>The hypothesis is that the polyphenols found in blueberries will reduce calcium loss from bones. | Osteoporosis, Postmenopausal Bone Loss, Age-related | Randomized crossover trial               | Duration: 52 weeks<br>Participants: 20 healthy women, aged 45 to 70 years<br><br>Group A: Blueberry Baseline<br>Group B: Blueberry Low (0,75 cups)<br>Group C: Blueberry Medium (1,5 cups)<br>Group D: Blueberry High (3 cups) | Not yet available                                                                                                                                                                        | NCT02630797 |
| Green tea extract                                                                                             | Osteoporosis                                        | Randomized controlled trial              | Duration: 24 weeks<br>Participants: 171 postmenopausal women with osteopenia<br><br>Group A: Placebo<br>Group B: Green Tea Polyphenols (GTP)<br>Group C: Placebo+Tai Chi (TC)<br>Group D: GTP+TC                               | GTP at a dose of 500 mg/day and/or TC exercise at 3 hr/week for 24 weeks appear to be safe in postmenopausal osteopenic women, particularly in terms of liver and kidney functions [22]. | NCT00625391 |
| Combined extract of mulberry and Vietnamese coriander (MP)                                                    | Healthy                                             | Randomized, double-blind crossover trial | Duration: 8 weeks<br>Participants: 45 healthy perimenopausal and postmenopausal women<br><br>Group A: Placebo<br>Group B: MP 50                                                                                                | This study clearly revealed that subjects in Group C, increased the total phenolic compounds in serum and improved bone                                                                  | NCT02562274 |

|                                                                                                      |                                |                                        |                                                                                                                                                                                                                                                            |                                                                                                                                                                                                                                                                                                                                                                                                                                                                                                            |                 |
|------------------------------------------------------------------------------------------------------|--------------------------------|----------------------------------------|------------------------------------------------------------------------------------------------------------------------------------------------------------------------------------------------------------------------------------------------------------|------------------------------------------------------------------------------------------------------------------------------------------------------------------------------------------------------------------------------------------------------------------------------------------------------------------------------------------------------------------------------------------------------------------------------------------------------------------------------------------------------------|-----------------|
|                                                                                                      |                                |                                        | mg/day<br>Group C: MP 1500<br>mg/day                                                                                                                                                                                                                       | formation<br>markers<br>including<br>osteocalcin and<br>alkaline<br>phosphatase<br>(ALP) but<br>decreased bone<br>resorption<br>marker<br>including serum<br>collagen type 1<br>cross-linked C-<br>telopeptide (beta<br>CTx) [23].                                                                                                                                                                                                                                                                         |                 |
| Fermented<br>red clover<br>(RC) extract<br>(Rich in<br>isoflavone<br>aglycones<br>and<br>probiotics) | Osteopenia<br><br>Osteoporosis | Random<br>ized<br>controlle<br>d trial | Duration: 8 weeks<br>Participants: 45<br>healthy<br>perimenopausal and<br>postmenopausal<br>women<br><br>Group A: Daily Red<br>clover extract 80mg,<br>Ca 1.040mg, VitD<br>25mg and Mg<br>487mg<br>Group B: Daily Ca<br>1.040mg, VitD 25mg<br>and Mg 487mg | Twice daily RCE<br>intake over 1<br>year potentially<br>attenuated BMD<br>loss caused by<br>estrogen<br>deficiency,<br>improved bone<br>turnover,<br>promoted a<br>favorable<br>estrogen<br>metabolite<br>profile (2-<br>OH:16 $\alpha$ -OH),<br>and stimulated<br>equol<br>production in<br>postmenopausal<br>women with<br>osteopenia. RCE<br>intake combined<br>with<br>supplementatio<br>n (calcium,<br>magnesium, and<br>calcitriol) was<br>more effective<br>than<br>supplementatio<br>n alone [24]. | NCT0217<br>4666 |
| Mediterranean Diet                                                                                   | Osteoporosis                   | Controlled trial                       | Duration: 24 weeks                                                                                                                                                                                                                                         | Not available<br>yet                                                                                                                                                                                                                                                                                                                                                                                                                                                                                       | NCT0165<br>3275 |

|                                                     |                            |                                    |                                                                                                                                                                                                                                                                                          |                                                                                                                                                                                                                                               |             |
|-----------------------------------------------------|----------------------------|------------------------------------|------------------------------------------------------------------------------------------------------------------------------------------------------------------------------------------------------------------------------------------------------------------------------------------|-----------------------------------------------------------------------------------------------------------------------------------------------------------------------------------------------------------------------------------------------|-------------|
|                                                     | Postmenopausal Bone Loss   |                                    | <p>Participants: 22 postmenopausal women</p> <p>Mediterranean Style Diet (olive oil, walnuts, frozen portions of high n-3 LCPUFA fish)</p>                                                                                                                                               |                                                                                                                                                                                                                                               |             |
| Diet with increased fruits, vegetables, and calcium | Osteoporosis               | Randomized Controlled trial        | <p>Duration: 2 years</p> <p>Participants: 228 girls 14- to 16-year-old with mass index below the national median</p> <p>Behavioral: Diet with increased fruits, vegetables, and calcium</p> <p>Behavioral: Increased high impact activity and resistance training</p>                    | <p>A comprehensive health care-based lifestyle intervention can effectively improve dietary intake and increase bone mineral gains in adolescent girls [25].</p>                                                                              | NCT00067600 |
| Genistein (soy isoflavones)                         | Osteopenia<br>Osteoporosis | Blinded randomized crossover trial | <p>Duration: &gt; 4 years</p> <p>Participants: 24 healthy postmenopausal women</p> <p>Group A: 5 soy isoflavone oral supplements (2 doses of a genistein-rich soy supplement and 3 doses of mixed isoflavones in various proportions)</p> <p>Group B: risedronate (a bisphosphonate)</p> | <p>Soy isoflavones, although not as potent as risedronate, are effective bone-preserving agents in postmenopausal women regardless of their equol-producing status, and mixed isoflavones in their natural ratios are more effective than</p> | NCT00244907 |

|                                   |                                |                                                                 |                                                                                                                                                                                   |                                                                                                                                                                                                                                                                                     |                 |
|-----------------------------------|--------------------------------|-----------------------------------------------------------------|-----------------------------------------------------------------------------------------------------------------------------------------------------------------------------------|-------------------------------------------------------------------------------------------------------------------------------------------------------------------------------------------------------------------------------------------------------------------------------------|-----------------|
|                                   |                                |                                                                 |                                                                                                                                                                                   | enriched<br>genistein [26].                                                                                                                                                                                                                                                         |                 |
| Hesperidin<br>(flavonoid)         | Osteopenia<br><br>Osteoporosis | Double<br>blinded<br><br>Random<br>ized<br>controlle<br>d trial | Duration: > 4 years<br>Participants: 110<br>healthy 50-65 years<br>old<br><br>Group A:<br>Hesperidin<br>Group B: Placebo                                                          | Not available<br>yet                                                                                                                                                                                                                                                                | NCT0033<br>0096 |
| Soy<br>isoflavones                | Osteoporosis                   | Double<br>blinded<br><br>Random<br>ized<br>controlle<br>d trial | Duration: 2 years<br>Participants: 403<br>healthy women 40 –<br>60 years old<br><br>Group A: Soy<br>isoflavones (80mg)<br>Group B: Soy<br>isoflavones (120mg)<br>Group C: Placebo | Daily<br>supplementatio<br>n for 2 years<br>with 80–120 mg<br>soy hypocotyl<br>isoflavones has<br>minimal risk in<br>healthy<br>menopausal<br>women [27].                                                                                                                           | NCT0066<br>5860 |
| Isoflavones-<br>enriched<br>foods | Osteoporosis                   | Double<br>blinded<br><br>Random<br>ized<br>controlle<br>d trial | Duration: 1 year<br>Participants: 300 post-<br>menopausal healthy<br>women 40 – 65 years<br>old<br><br>Group A:<br>Isoflavones-enriched<br>foods<br>Group B: Placebo              | Consumption of<br>foods containing<br>110 mg/day of<br>soy isoflavone<br>aglycone<br>equivalents for 1<br>year did not<br>prevent<br>postmenopausal<br>bone loss and<br>did not affect<br>bone turnover in<br>apparently<br>healthy early<br>postmenopausal<br>white women<br>[28]. | NCT0030<br>1353 |

## 2.2. MD simulations

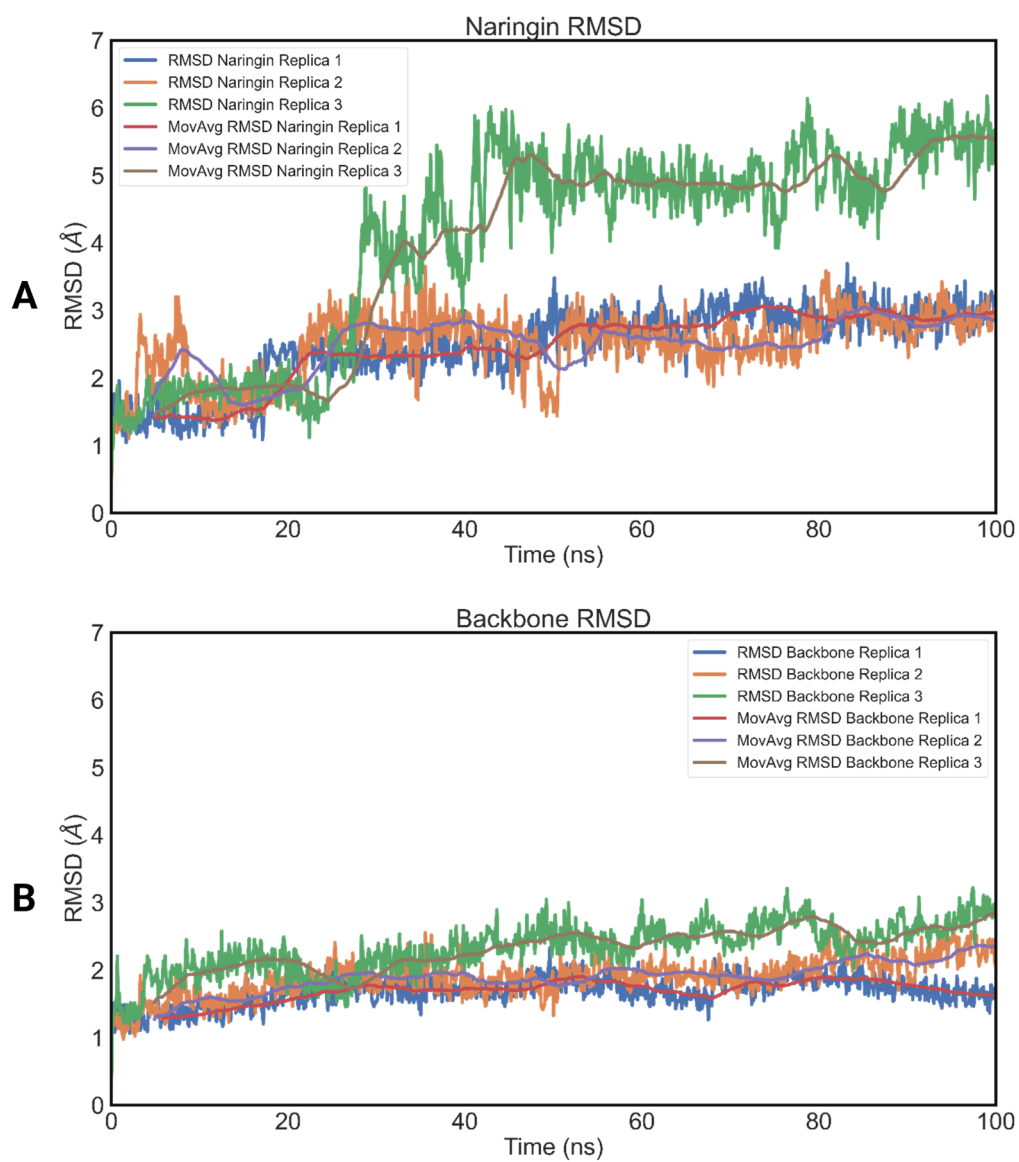

**Figure S1.** A) RMSD of the three replicas of naringin bound to ERK1 as a function of time, B) RMSD of the three replicas of the protein backbone of ERK1 as a function of time.

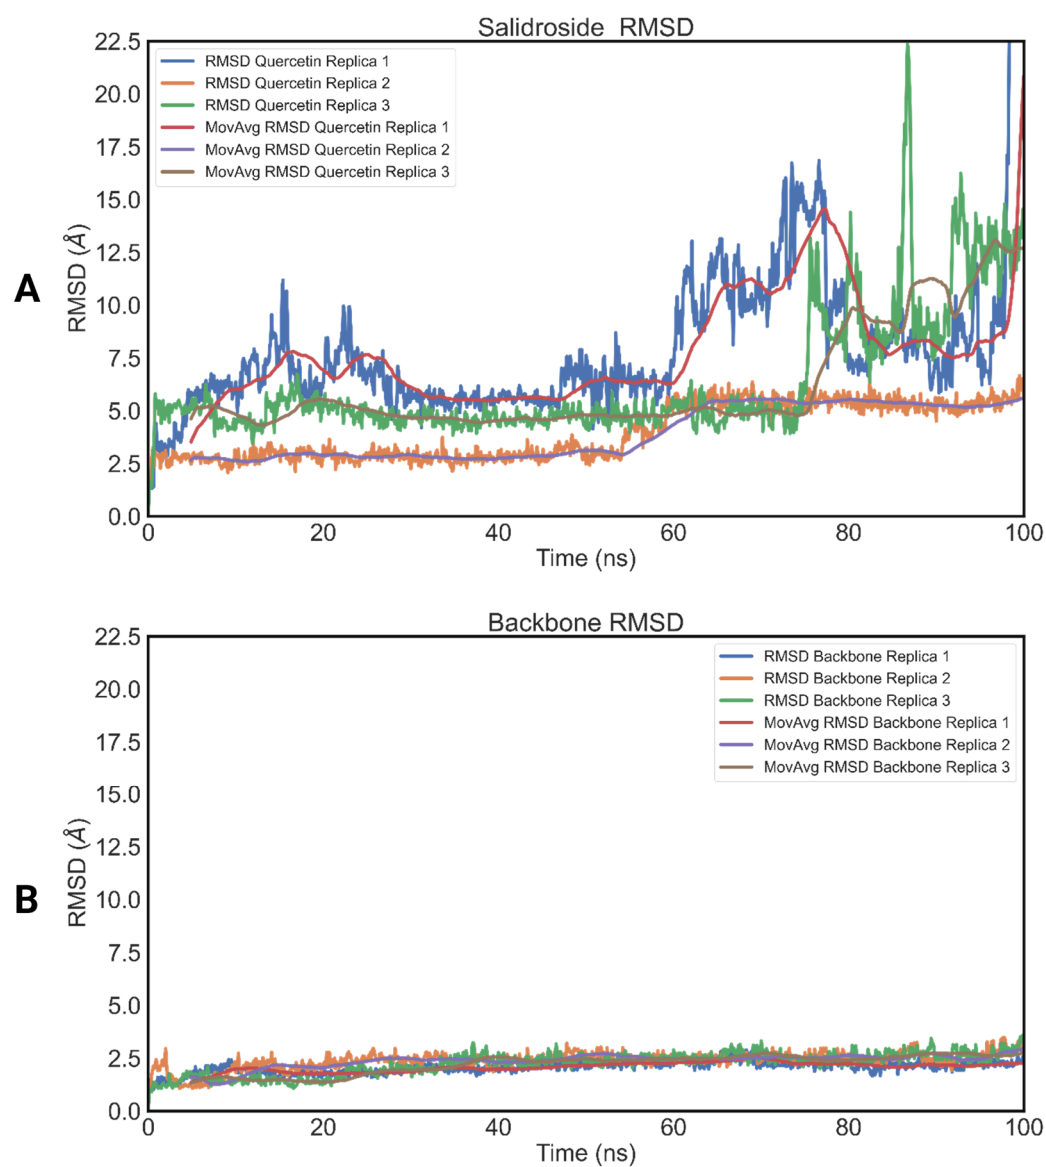

**Figure S2.** A) RMSD of the three replicas of salidroside bound to ERK1 as a function of time, B) RMSD of the three replicas of the protein backbone of ERK1 as a function of time.

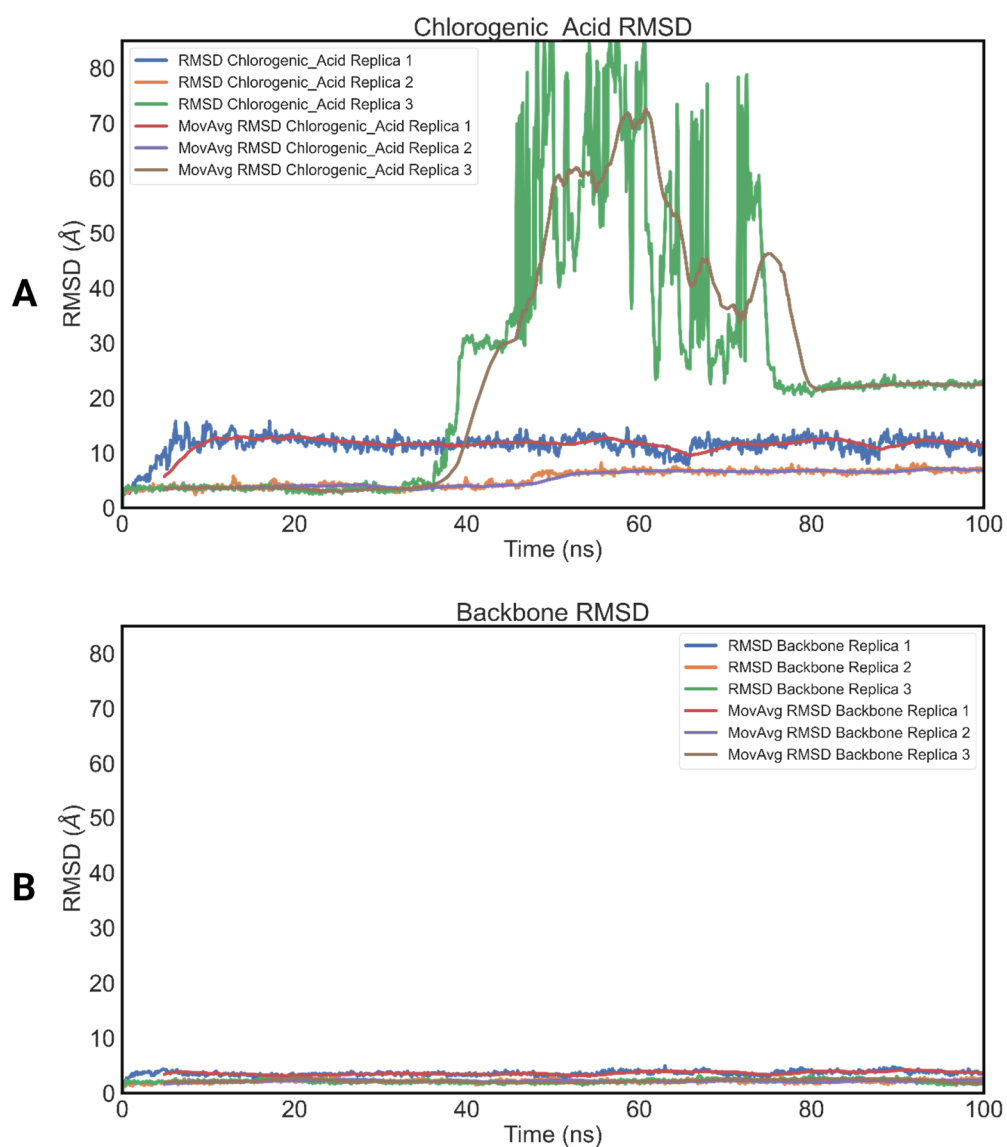

**Figure S3.** A) RMSD of the three replicas of chlorogenic acid bound to ERK1 as a function of time, B) RMSD of the three replicas of the protein backbone of ERK1 as a function of time.

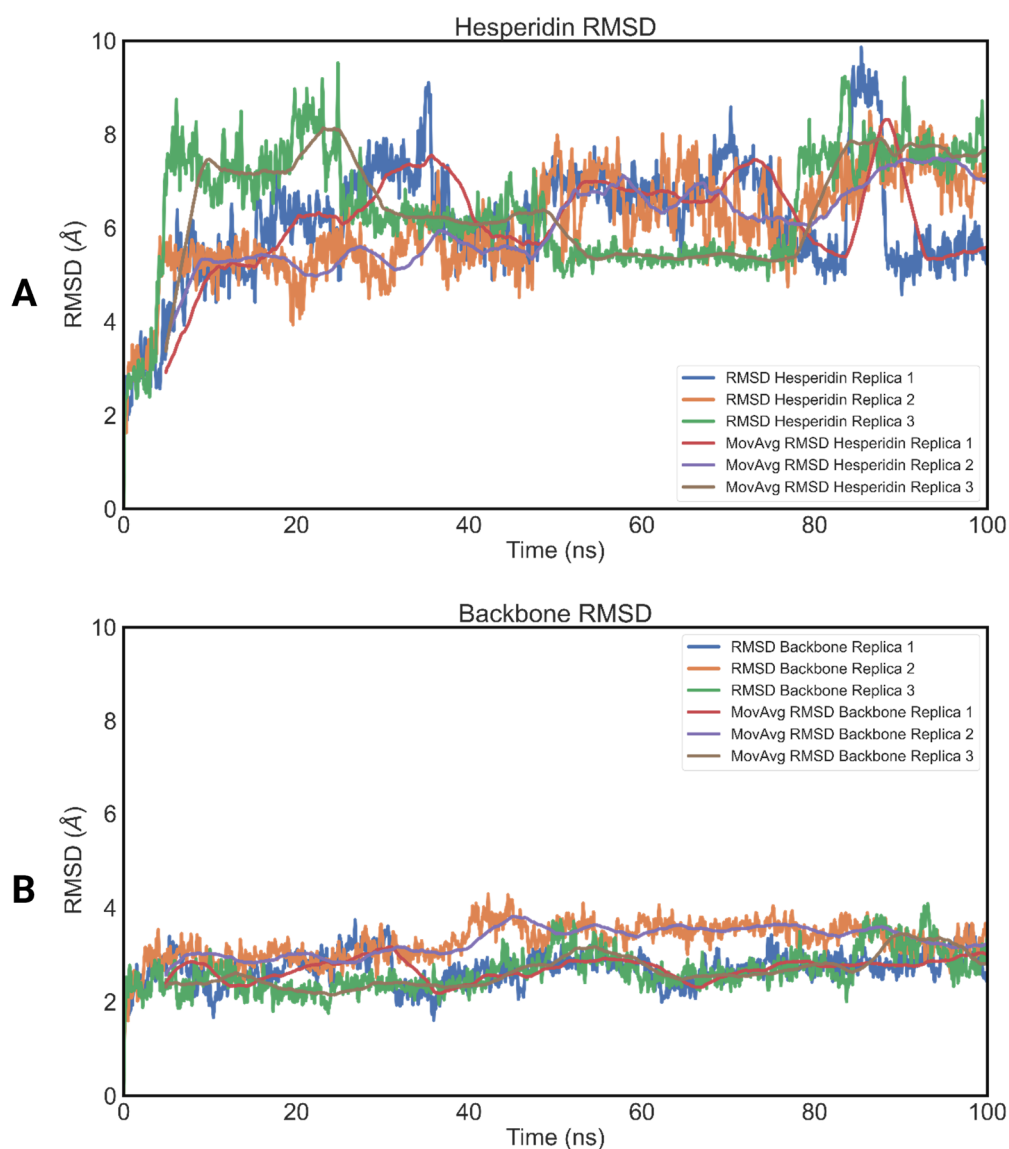

**Figure S4.** A) RMSD of the three replicas of hesperidin bound to ERK1 as a function of time, B) RMSD of the three replicas of the protein backbone of ERK1 as a function of time.

**Table S4.** Average values of RMSD and standard deviation of the protein backbone for each ERK1-ligand complex were calculated over the 100 ns MD simulations.

| Replica ID | RMSD quercetin (Å) | RMSD naringin (Å) | RMSD salidroside (Å) | RMSD chlorogenic acid (Å) | RMSD hesperidin (Å) |
|------------|--------------------|-------------------|----------------------|---------------------------|---------------------|
| 1          | 1.53 ± 0.19        | 1.70 ± 0.24       | 2.07 ± 0.30          | 3.63 ± 0.40               | 2.70 ± 0.34         |
| 2          | 1.71 ± 0.30        | 1.90 ± 0.29       | 2.39 ± 0.41          | 2.17 ± 0.28               | 3.28 ± 0.39         |
| 3          | 1.81 ± 0.26        | 2.32 ± 0.38       | 2.23 ± 0.53          | 2.22 ± 0.35               | 2.65 ± 0.41         |



|              |                 |                 |                 |                 |                 |
|--------------|-----------------|-----------------|-----------------|-----------------|-----------------|
| Average RMSD | $1.68 \pm 0.13$ | $1.97 \pm 0.32$ | $2.23 \pm 0.16$ | $2.67 \pm 0.82$ | $2.87 \pm 0.35$ |
|--------------|-----------------|-----------------|-----------------|-----------------|-----------------|

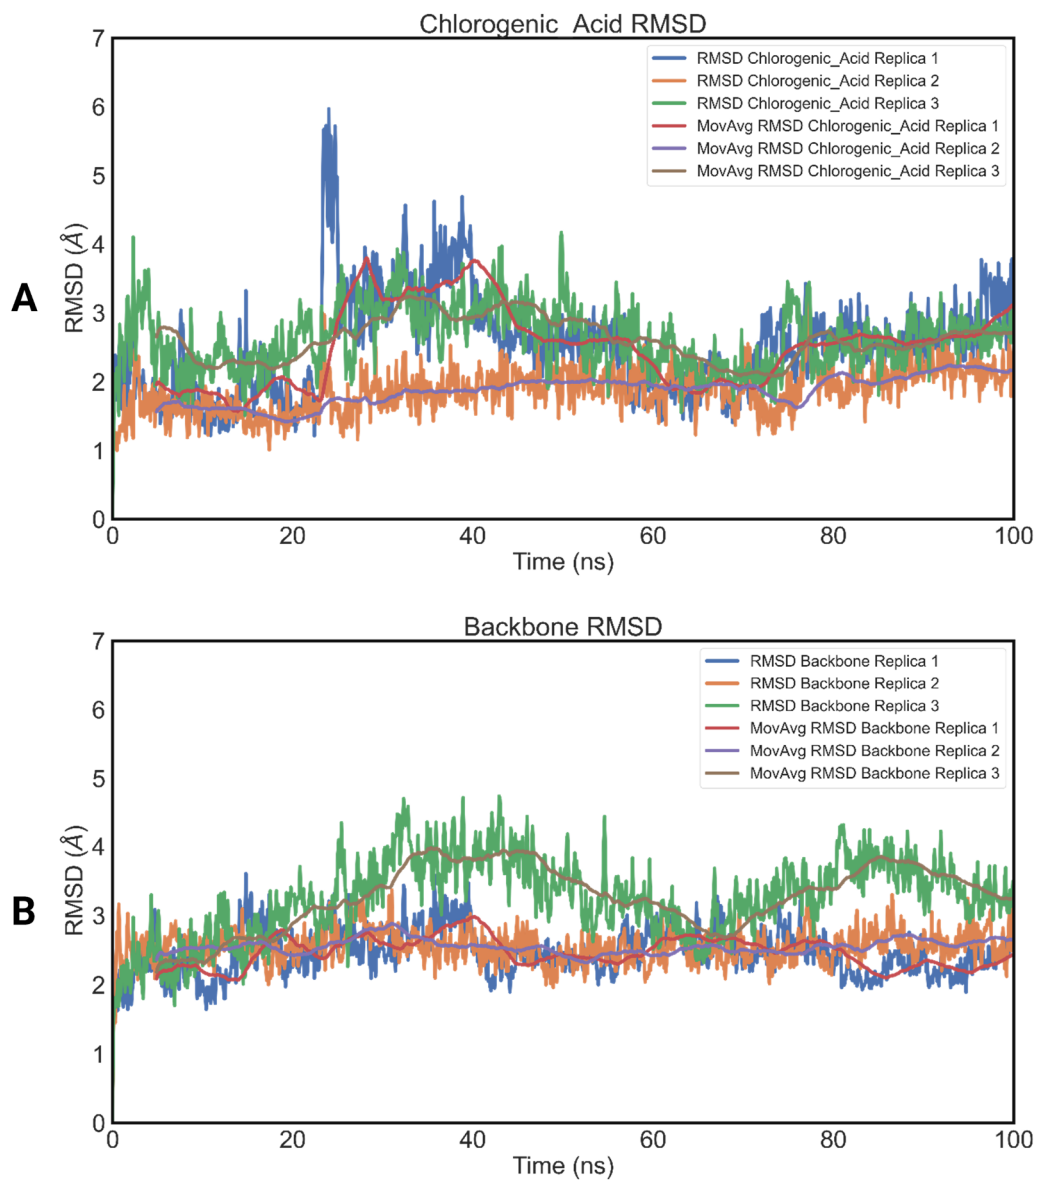

**Figure S5.** A) RMSD of the three replicas of chlorogenic acid bound to p38b as a function of time, B) RMSD of the three replicas of the protein backbone of p38b as a function of time.

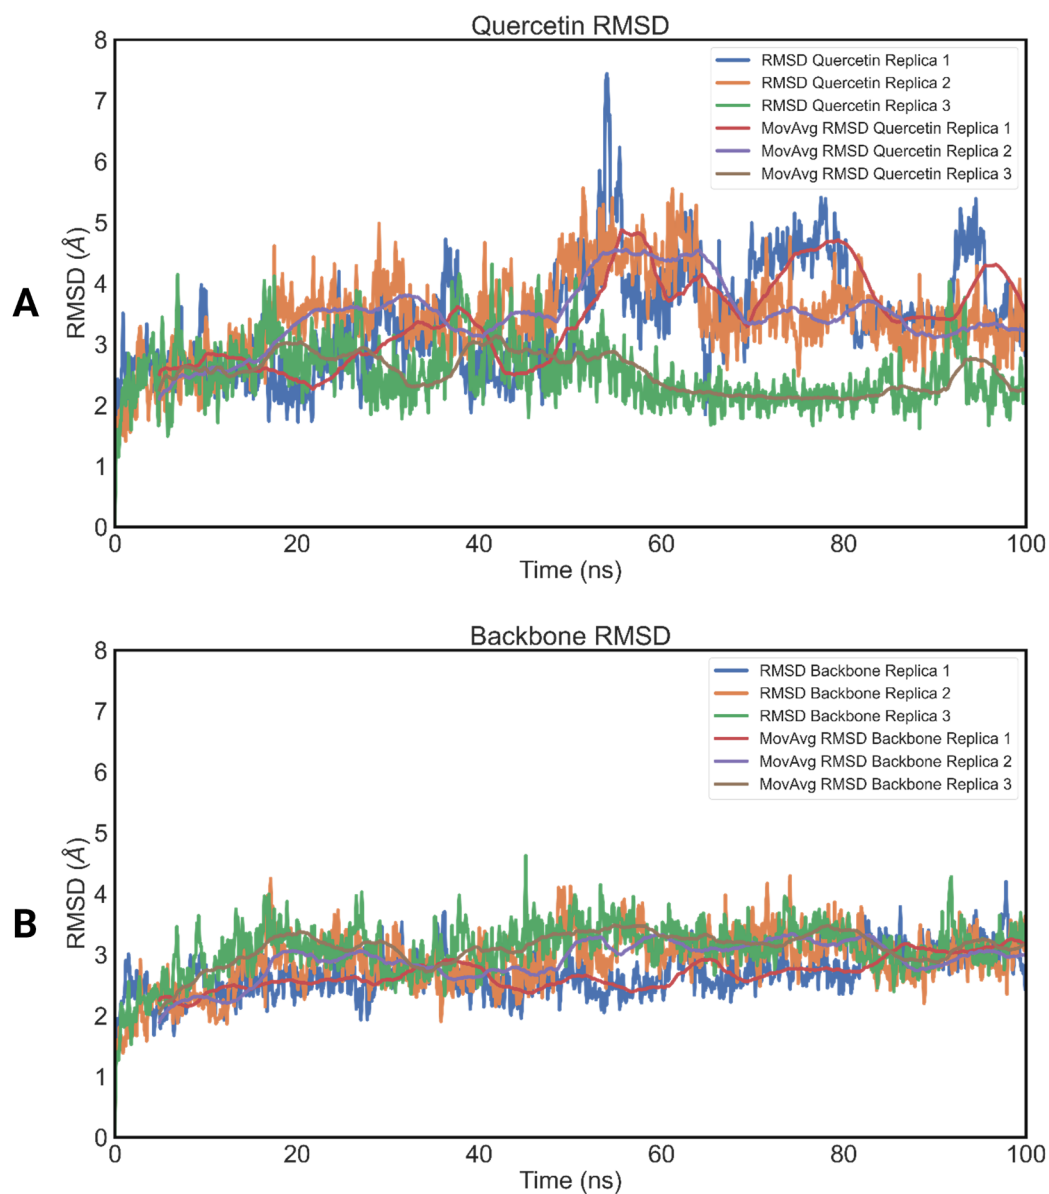

**Figure S6.** A) RMSD of the three replicas of quercetin bound to p38b as a function of time, B) RMSD of the three replicas of the protein backbone of p38b as a function of time.

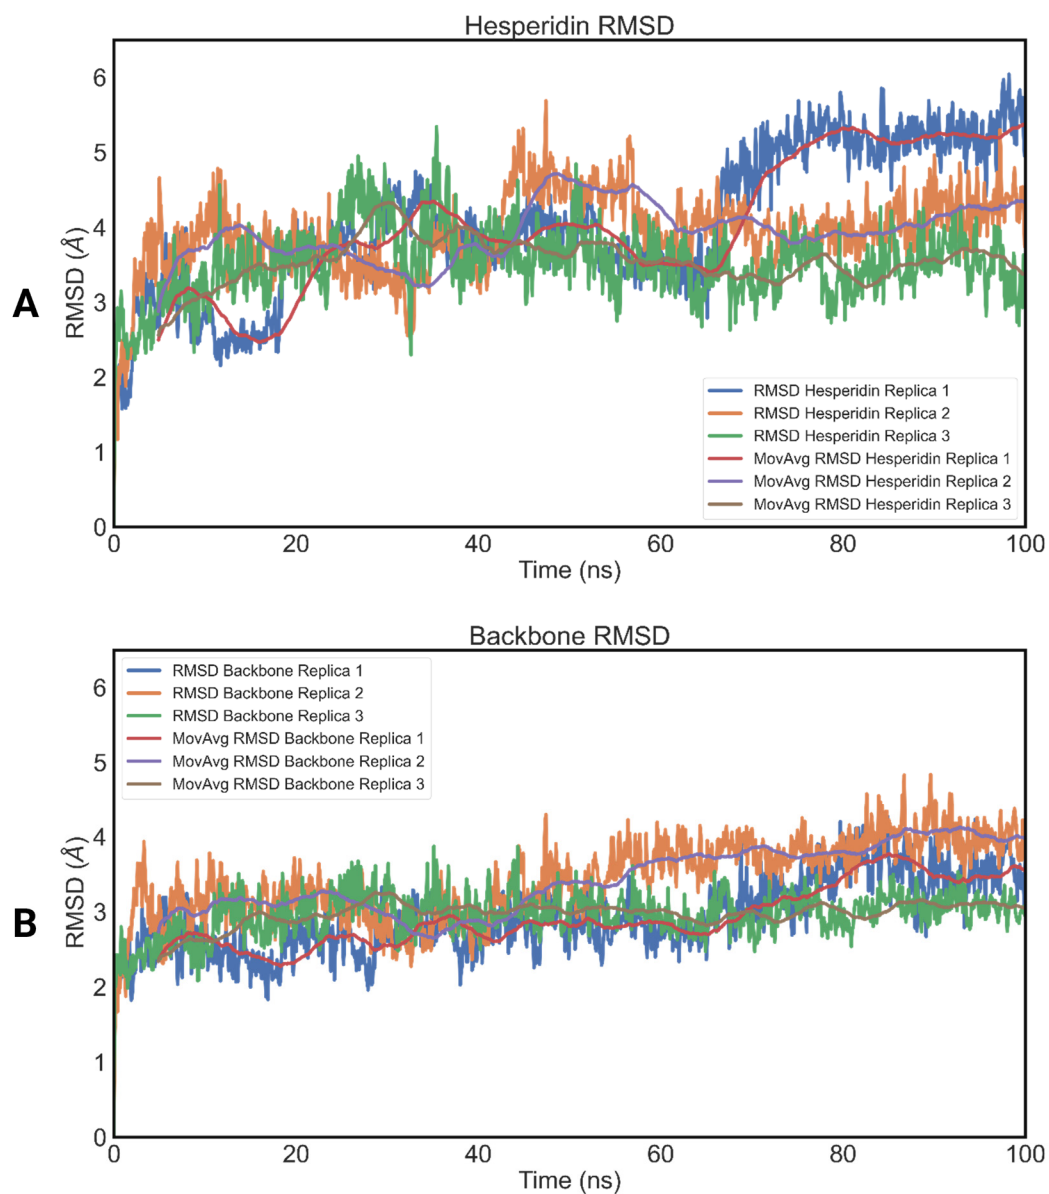

**Figure S7.** A) RMSD of the three replicas of hesperidin bound to p38b as a function of time, B) RMSD of the three replicas of the protein backbone of p38b as a function of time.

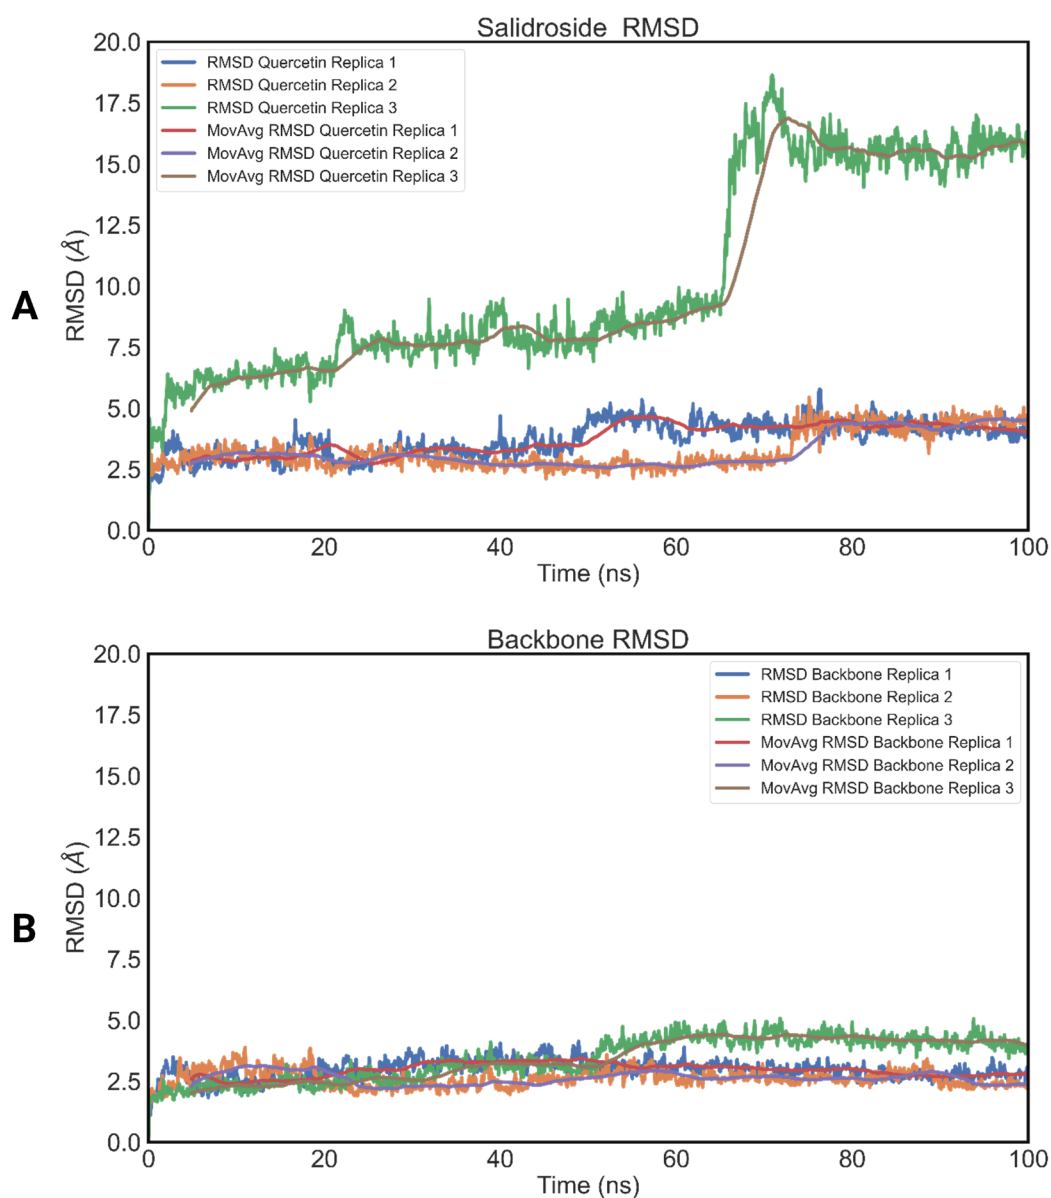

**Figure S8.** A) RMSD of the three replicas of salidroside bound to p38b as a function of time, B) RMSD of the three replicas of the protein backbone of p38b as a function of time.

**Table S5.** Average values of RMSD and standard deviation of the protein backbone for each p38b-ligand complex were calculated over the 100 ns MD simulations.

| Replica ID | RMSD quercetin (Å) | RMSD naringin (Å) | RMSD salidroside (Å) | RMSD chlorogenic acid (Å) | RMSD hesperidin (Å) |
|------------|--------------------|-------------------|----------------------|---------------------------|---------------------|
| 1          | 2.69 ± 0.37        | 2.84 ± 0.39       | 2.95 ± 0.40          | 2.45 ± 0.34               | 2.93 ± 0.49         |
| 2          | 2.89 ± 0.47        | 2.83 ± 0.47       | 2.60 ± 0.36          | 2.55 ± 0.25               | 3.42 ± 0.53         |
| 3          | 3.10 ± 0.42        | 2.59 ± 0.27       | 3.42 ± 0.86          | 3.24 ± 0.58               | 2.96 ± 0.29         |

|              |                 |                 |                 |                 |                 |
|--------------|-----------------|-----------------|-----------------|-----------------|-----------------|
| Average RMSD | $2.89 \pm 0.20$ | $2.76 \pm 0.14$ | $2.99 \pm 0.41$ | $2.75 \pm 0.43$ | $3.10 \pm 0.28$ |
|--------------|-----------------|-----------------|-----------------|-----------------|-----------------|

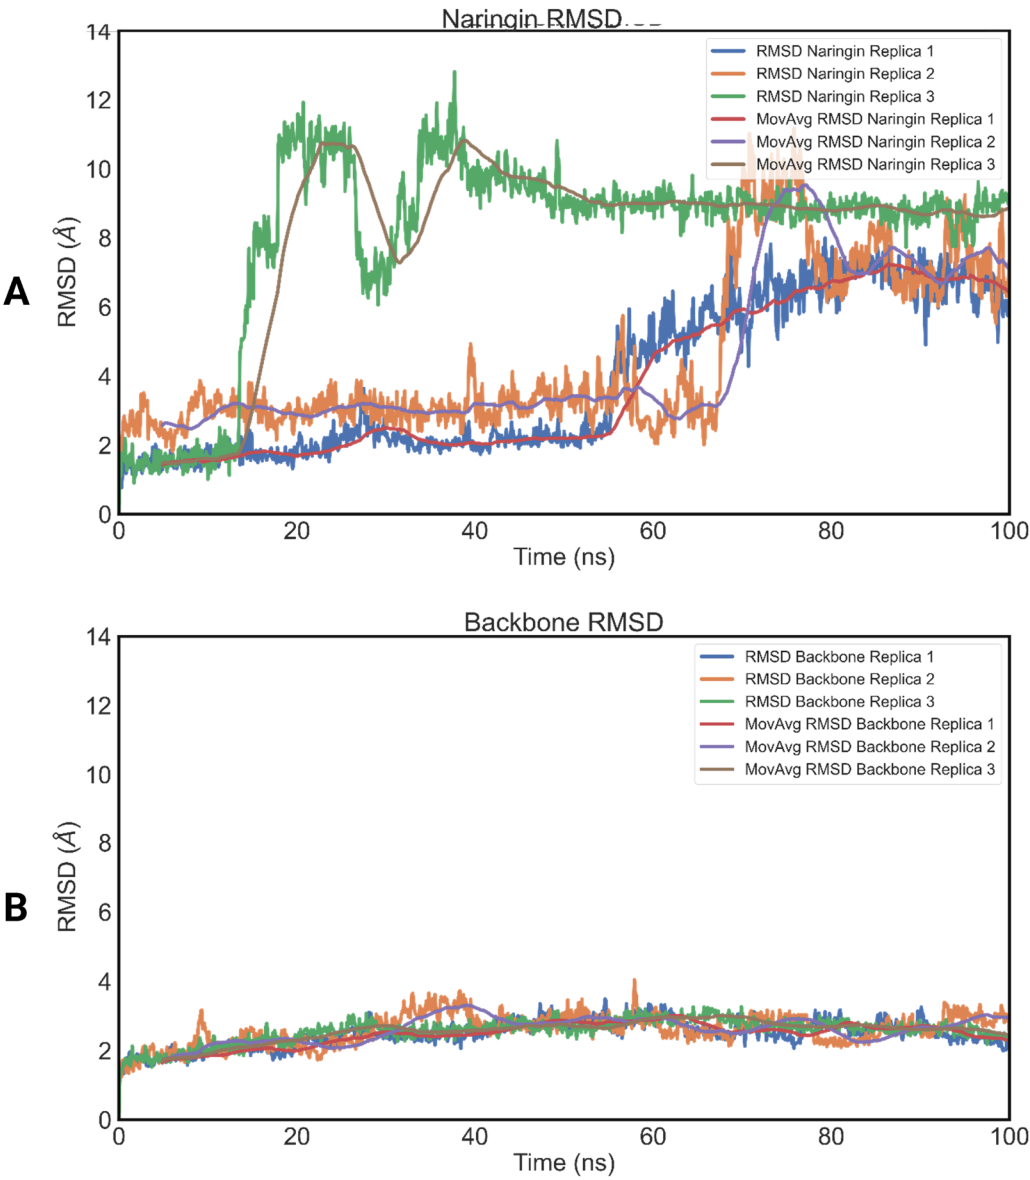

**Figure S9.** A) RMSD of the three replicas of naringin bound to JNK1 as a function of time, B) RMSD of the three replicas of the protein backbone of JNK1 as a function of time.

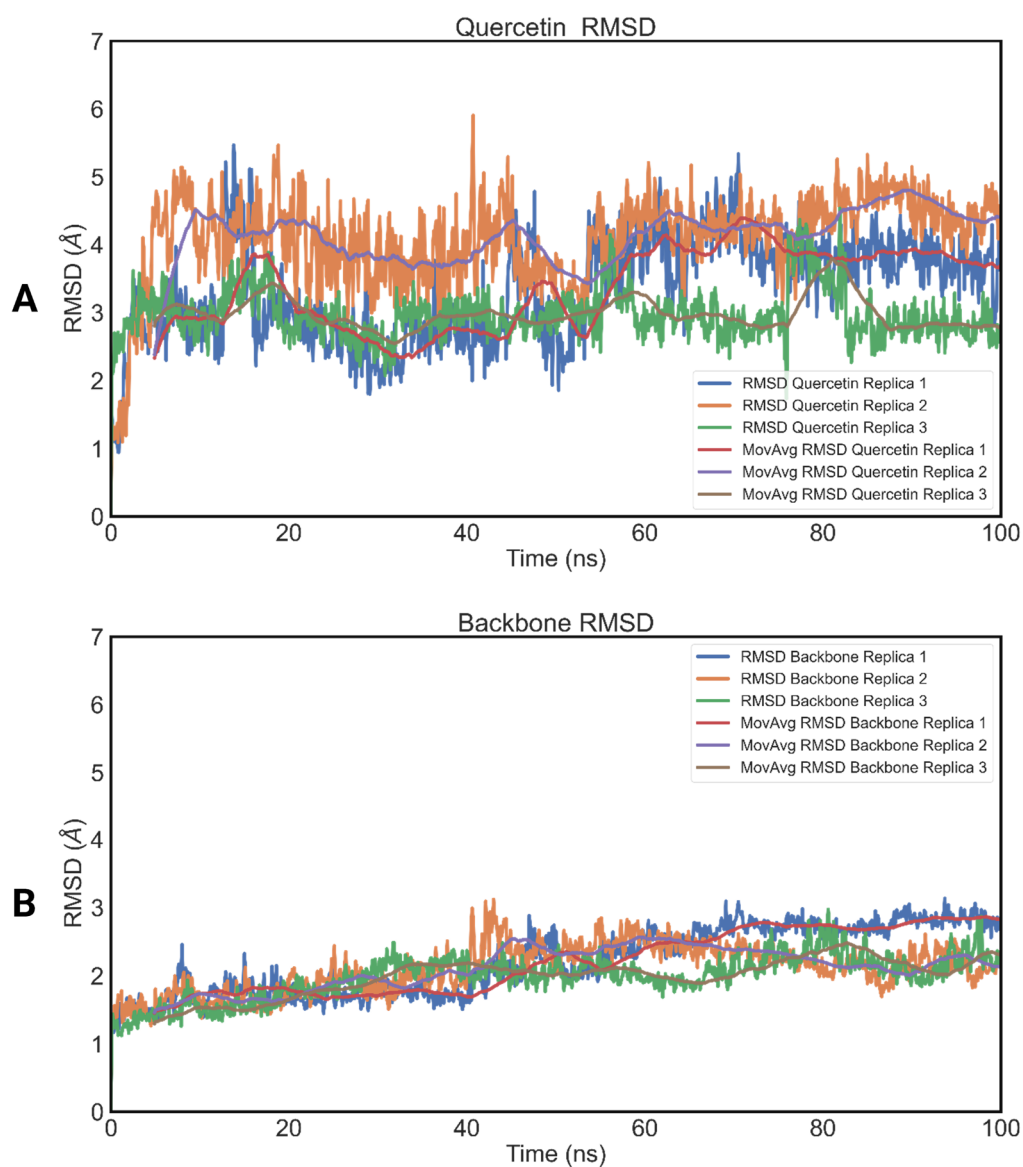

**Figure S10.** A) RMSD of the three replicas of quercetin bound to JNK1 as a function of time, B) RMSD of the three replicas of the protein backbone of JNK1 as a function of time.

**Table S6.** Average values of RMSD and standard deviation of each JNK1-ligand complex were calculated over the 100 ns MD simulations.

| Replica ID   | RMSD quercetin (Å) | RMSD naringin (Å) |
|--------------|--------------------|-------------------|
| 1            | $3.34 \pm 0.77$    | $3.88 \pm 2.23$   |
| 2            | $4.09 \pm 0.67$    | $4.58 \pm 2.33$   |
| 3            | $2.97 \pm 0.37$    | $8.08 \pm 2.75$   |
| Average RMSD | $3.47 \pm 0.56$    | $5.51 \pm 2.25$   |

**Table S7.** Average values of RMSD and standard deviation of the protein backbone for each JNK1-ligand complex were calculated over the 100 ns MD simulations.

| Replica ID   | RMSD quercetin (Å) | RMSD naringin (Å) |
|--------------|--------------------|-------------------|
| 1            | 2.21 ± 0.49        | 2.46 ± 0.39       |
| 2            | 2.10 ± 0.35        | 2.60 ± 0.45       |
| 3            | 1.98 ± 0.33        | 2.56 ± 0.35       |
| Average RMSD | 2.10 ± 0.11        | 2.54 ± 0.07       |

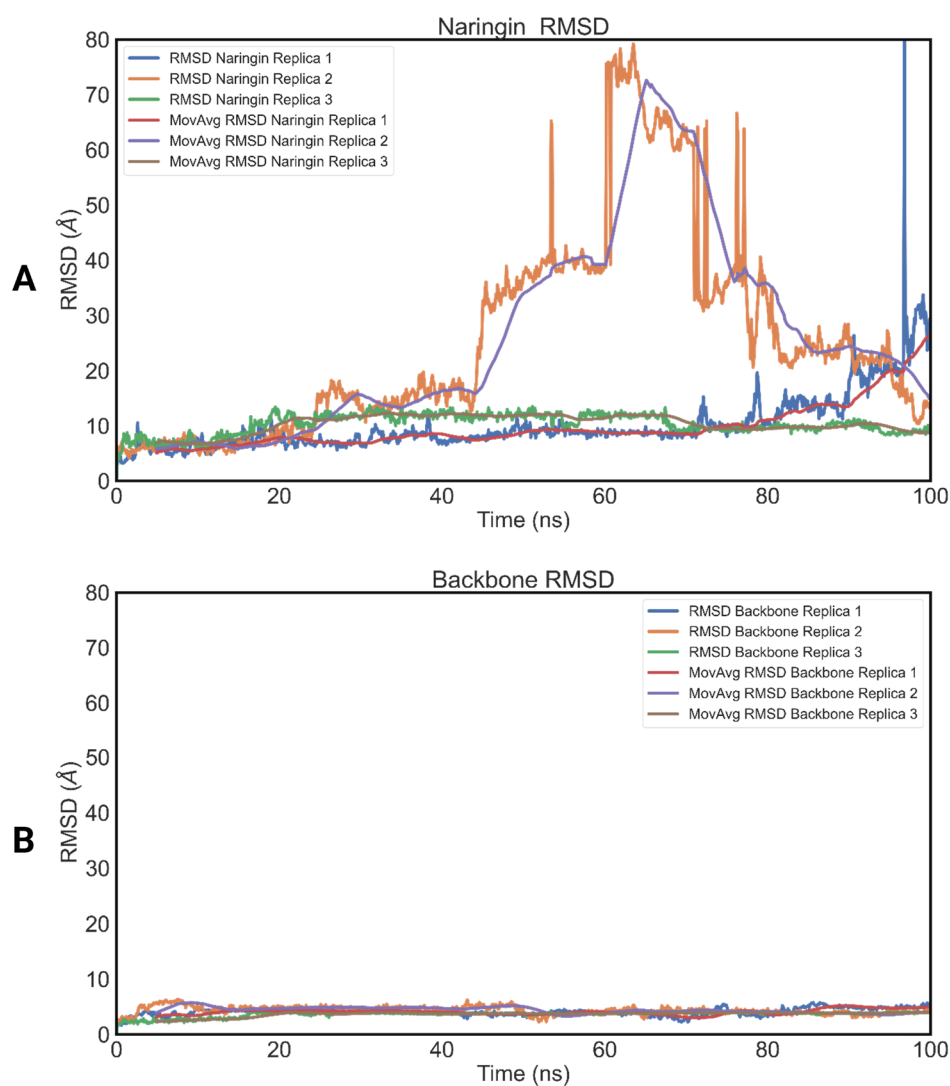**Figure S11.** A) RMSD of the three replicas of naringin bound to p38c as a function of time, B) RMSD of the three replicas of the protein backbone of p38c as a function of time.

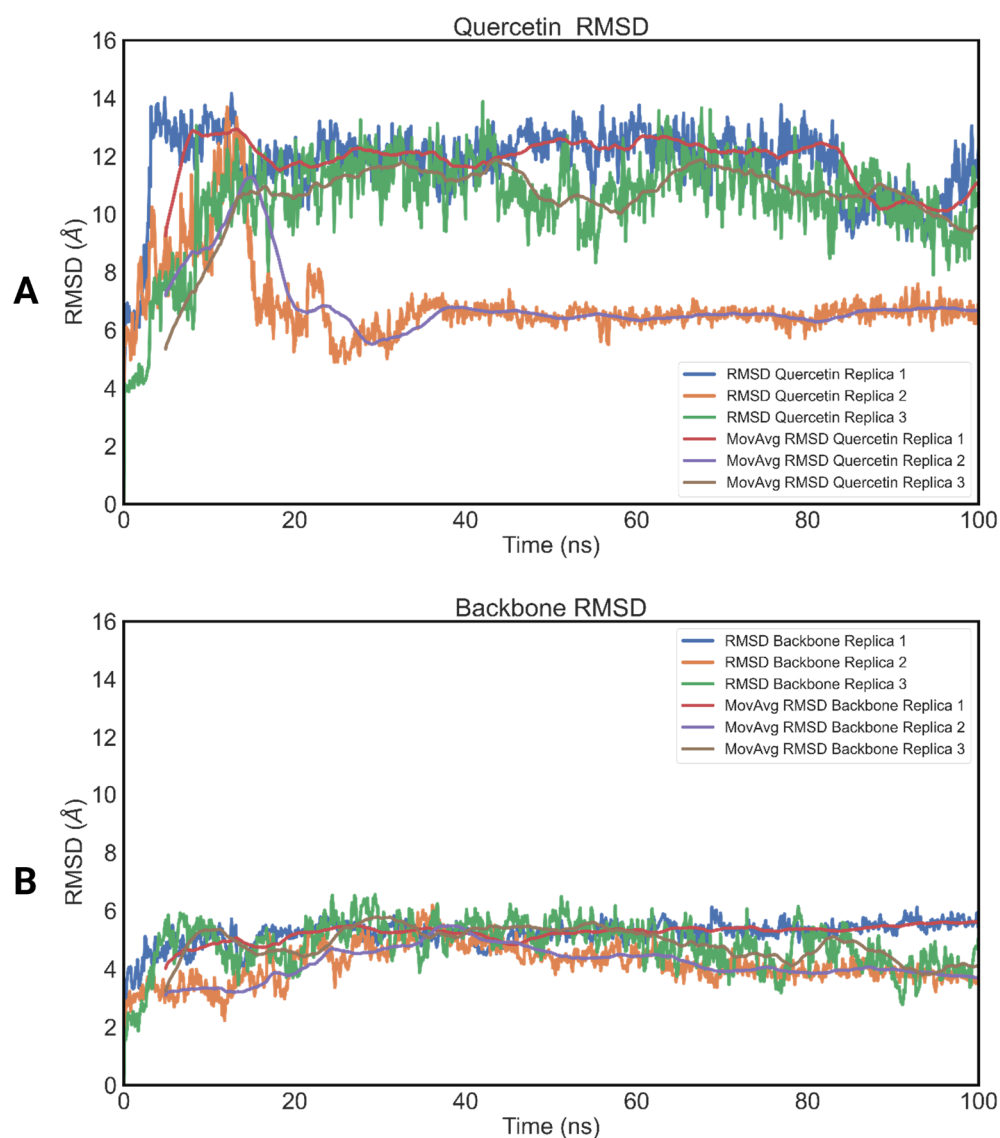

**Figure S12.** A) RMSD of the three replicas of quercetin bound to p38c as a function of time, B) RMSD of the three replicas of the protein backbone of p38c as a function of time.

**Table S8.** Average values of RMSD and standard deviation of each p38c-ligand complex were calculated over the 100 ns MD simulations.

| Replica ID   | RMSD quercetin (Å) | RMSD naringin (Å) |
|--------------|--------------------|-------------------|
| 1            | 11.77 ± 1.32       | 10.08 ± 5.50      |
| 2            | 6.89 ± 1.31        | 25.43 ± 18.71     |
| 3            | 10.49 ± 1.70       | 10.28 ± 1.87      |
| Average RMSD | 9.72 ± 2.07        | 15.26 ± 7.19      |



**Table S9.** Average values of RMSD and standard deviation of the protein backbone for each p38c-ligand complex were calculated over the 100 ns MD simulations.

| Replica ID   | RMSD quercetin (Å) | RMSD naringin (Å) |
|--------------|--------------------|-------------------|
| 1            | $5.22 \pm 0.46$    | $4.05 \pm 0.66$   |
| 2            | $4.16 \pm 0.67$    | $4.38 \pm 0.72$   |
| 3            | $4.83 \pm 0.83$    | $3.65 \pm 0.50$   |
| Average RMSD | $4.73 \pm 0.53$    | $4.02 \pm 0.37$   |

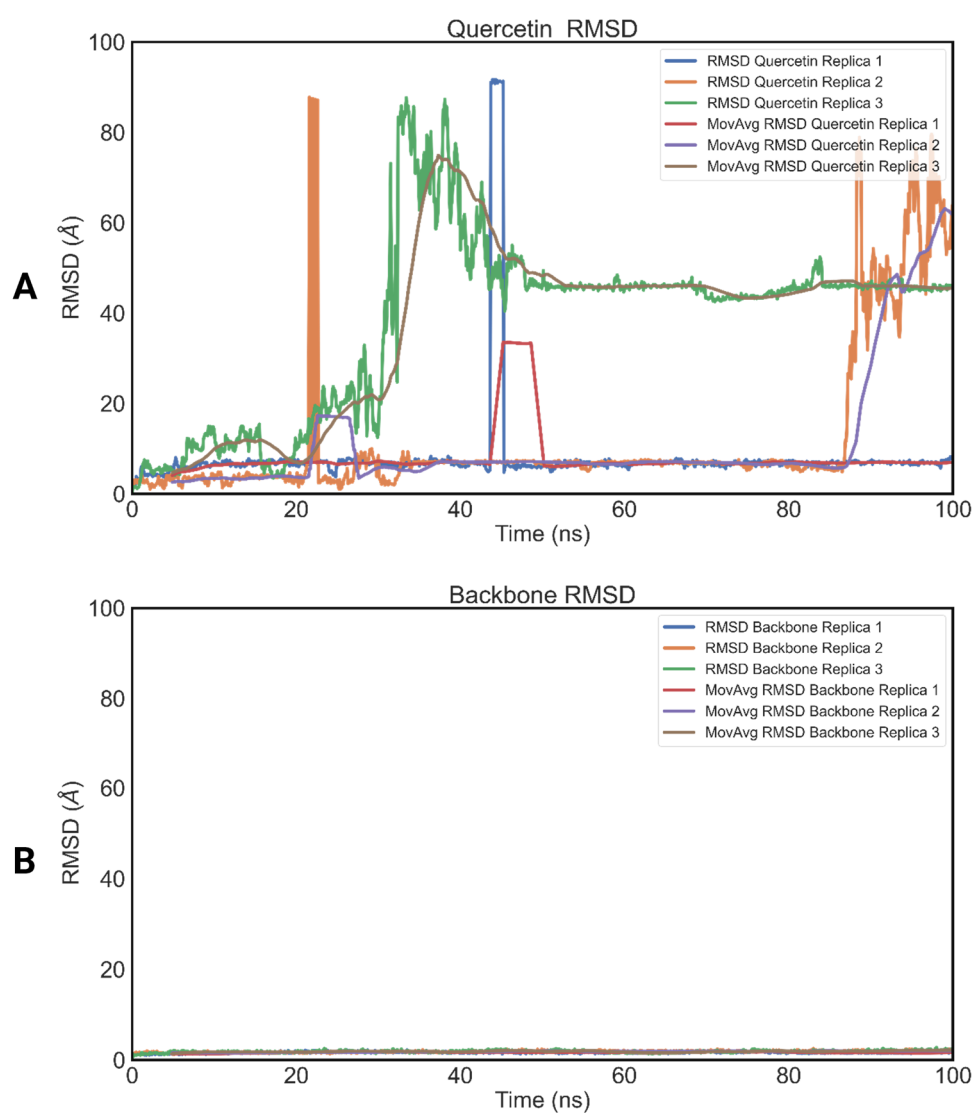

**Figure S13.** A) RMSD of the three replicas of quercetin bound to ERK2 as a function of time, B) RMSD of the three replicas of the protein backbone of p38c as a function of time.

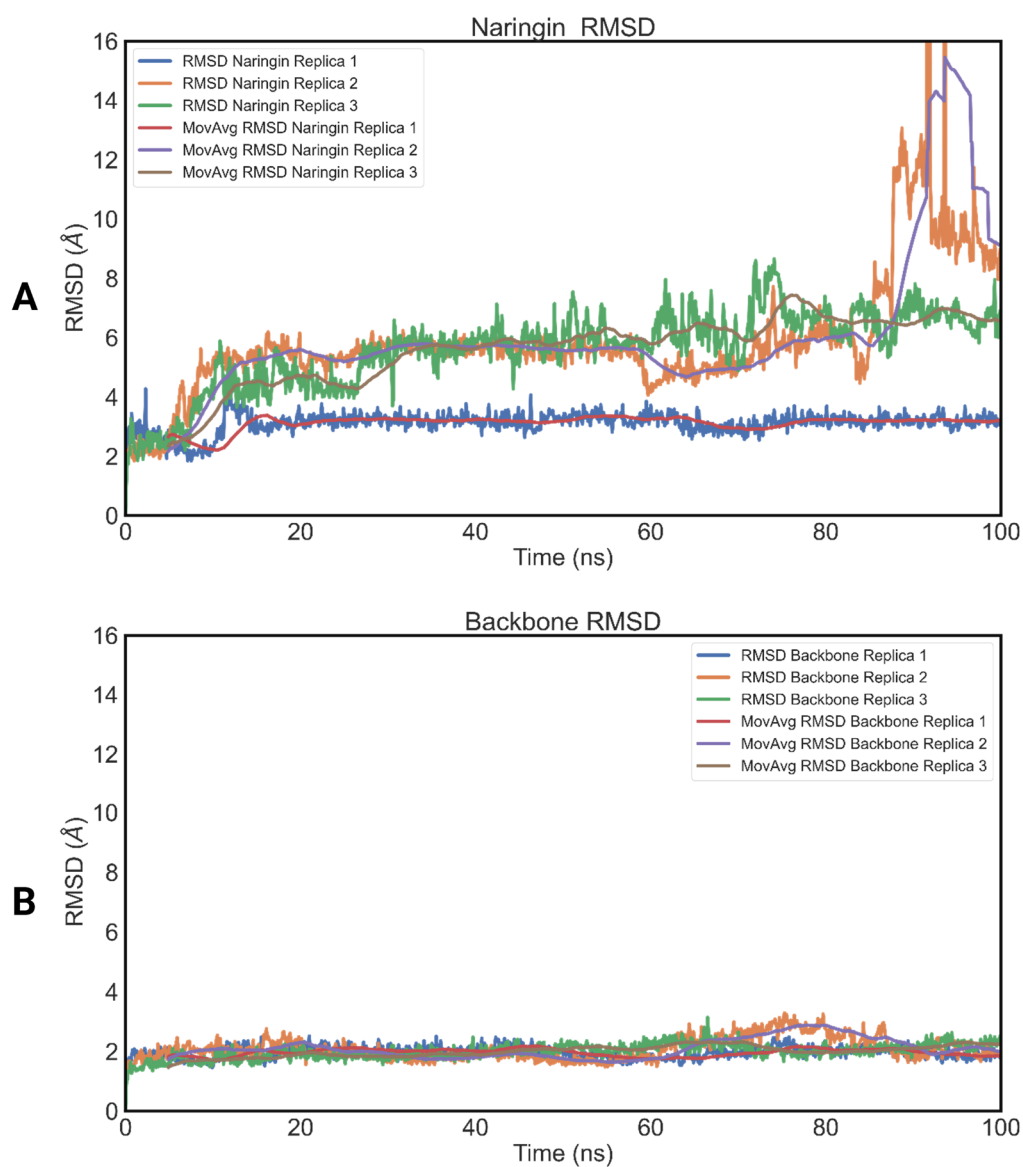

**Figure S14.** A) RMSD of the three replicas of naringin bound to ERK2 as a function of time, B) RMSD of the three replicas of the protein backbone of ERK2 as a function of time.

**Table S10.** Average values of RMSD and standard deviation of each ERK2-ligand complex were calculated over the 100 ns MD simulations.

| Replica ID   | RMSD quercetin (Å) | RMSD naringin (Å) |
|--------------|--------------------|-------------------|
| 1            | 7.99 ± 10.65       | 3.12 ± 0.36       |
| 2            | 12.44 ± 17.97      | 6.10 ± 4.77       |
| 3            | 38.00 ± 19.45      | 5.61 ± 1.32       |
| Average RMSD | 19.48 ± 13.22      | 4.94 ± 1.30       |

**Table S11.** Average values of RMSD and standard deviation of the protein backbone for each ERK2-ligand complex were calculated over the 100 ns MD simulations.

| Replica ID   | RMSD quercetin (Å) | RMSD naringin (Å) |
|--------------|--------------------|-------------------|
| 1            | $1.68 \pm 0.20$    | $1.96 \pm 0.20$   |
| 2            | $1.88 \pm 0.22$    | $2.08 \pm 0.38$   |
| 3            | $1.90 \pm 0.26$    | $2.00 \pm 0.26$   |
| Average RMSD | $1.82 \pm 0.12$    | $2.01 \pm 0.06$   |

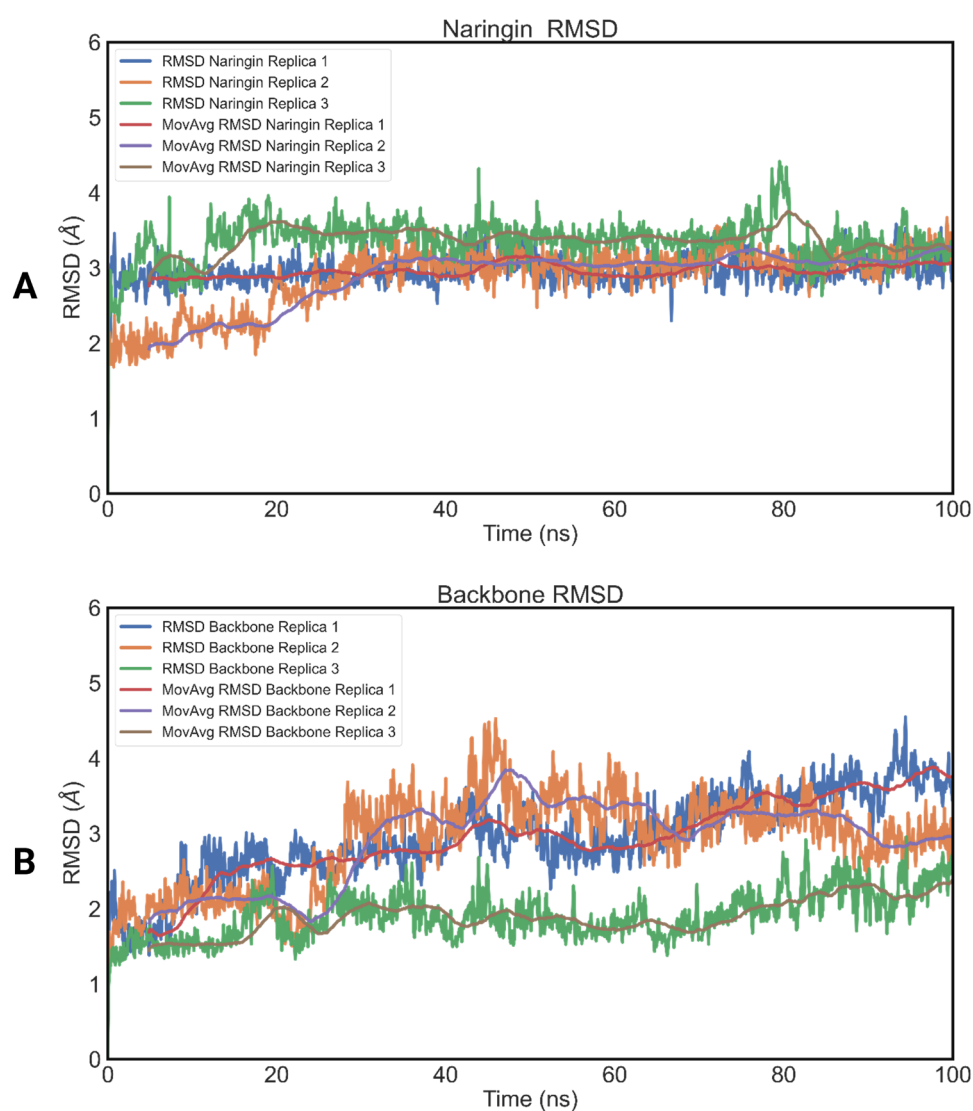

**Figure S15.** A) RMSD of the three replicas of naringin bound to JNK2 as a function of time, B) RMSD of the three replicas of the protein backbone of JNK2 as a function of time.

**Table S12.** Average values of RMSD and standard deviation of the protein backbone for each JNK2-ligand complex were calculated over the 100 ns MD simulations.

| Replica ID   | RMSD quercetin (Å) | RMSD naringin (Å) |
|--------------|--------------------|-------------------|
| 1            | 2.36 ± 0.41        | 2.95 ± 0.58       |
| 2            | 1.90 ± 0.24        | 2.90 ± 0.62       |
| 3            | 1.95 ± 0.25        | 1.90 ± 0.32       |
| Average RMSD | 2.07 ± 0.25        | 2.58 ± 0.59       |

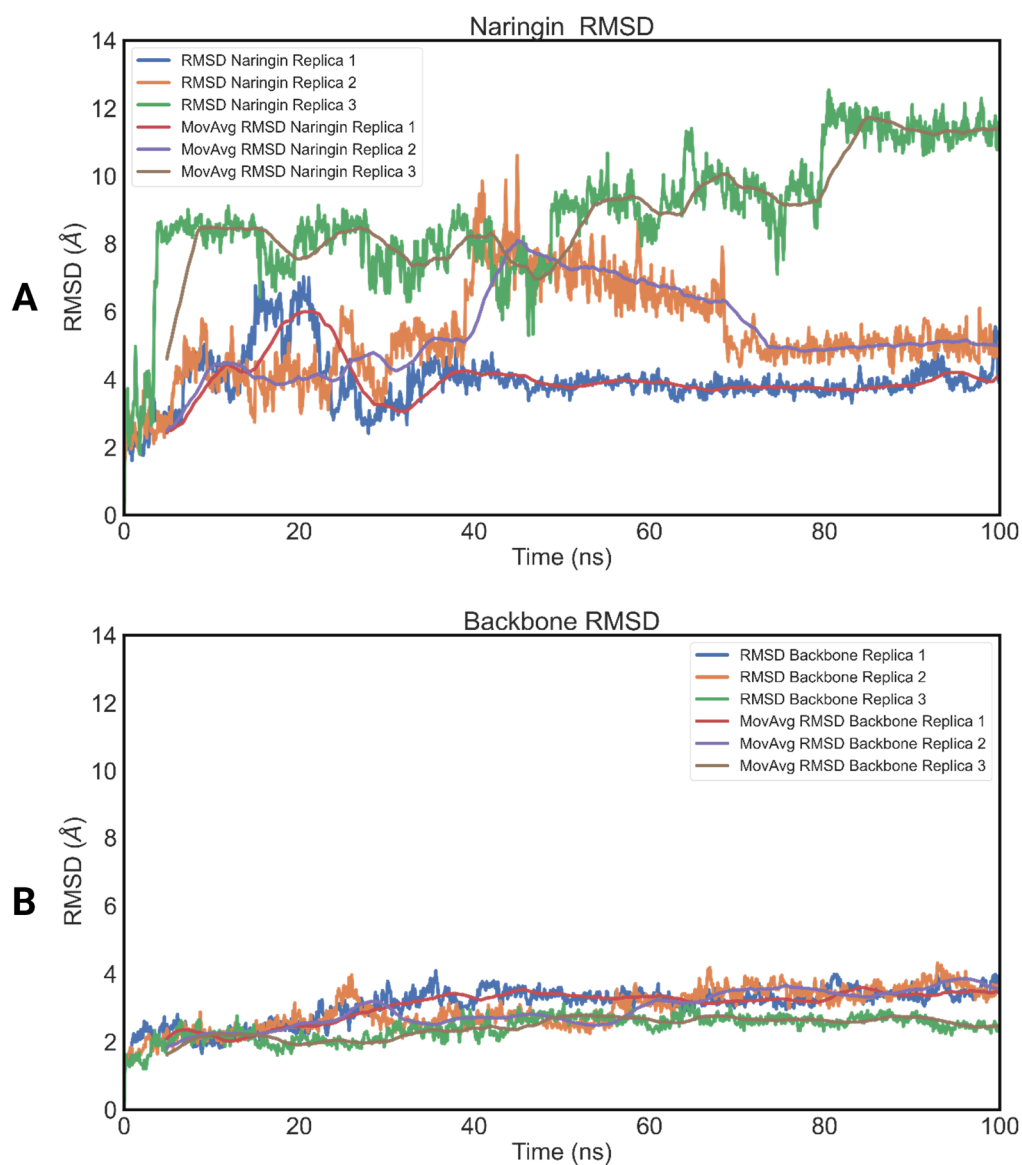**Figure S16.** A) RMSD of the three replicas of naringin bound to JNK3 as a function of time, B) RMSD of the three replicas of the protein backbone of JNK3 as a function of time.

**Table S13.** Average values of RMSD and standard deviation of the protein backbone for each JNK3-ligand complex were calculated over the 100 ns MD simulations.

| Replica ID   | RMSD quercetin (Å) | RMSD naringin (Å) |
|--------------|--------------------|-------------------|
| 1            | 2.47 ± 0.31        | 3.07 ± 0.52       |
| 2            | 2.36 ± 0.25        | 2.94 ± 0.59       |
| 3            | 2.50 ± 0.46        | 2.41 ± 0.36       |
| Average RMSD | 2.45 ± 0.08        | 2.81 ± 0.35       |

## References

- [1] EFSA Panel on Additives and Products or Substances used in Animal Feed (FEEDAP), “Scientific Opinion on the safety and efficacy of naringin when used as a sensory additive for all animal species,” *EFSA J.*, vol. 9, no. 11, p. 2416, 2011, doi: 10.2903/j.efsa.2011.2416.
- [2] EFSA Panel on Additives and Products or Substances used in Animal Feed (FEEDAP) *et al.*, “Assessment of the feed additive consisting of naringin for all animal species for the renewal of its authorisation (HealthTech Bio Actives, S.L.U. (HTBA)),” *EFSA J.*, vol. 20, no. 4, p. e07267, 2022, doi: 10.2903/j.efsa.2022.7267.
- [3] EFSA Panel on Additives and Products or Substances used in Animal Feed (FEEDAP) *et al.*, “Safety of vitamin B12 (in the form of cyanocobalamin) produced by Ensifer adhaerens CNCM-I 5541 for all animal species,” *EFSA J.*, vol. 18, no. 12, p. e06335, 2020, doi: 10.2903/j.efsa.2020.6335.
- [4] EFSA Panel on Dietetic Products, Nutrition and Allergies (NDA), “Scientific Opinion on the substantiation of health claims related to rutin and improvement of endothelium-dependent vasodilation (ID 1649, 1783) and protection of DNA, proteins and lipids from oxidative damage (ID 1784) pursuant to Article 13(1) of Regulation (EC) No 1924/2006,” *EFSA J.*, vol. 8, no. 10, p. 1751, 2010, doi: 10.2903/j.efsa.2010.1751.
- [5] EFSA Panel on Dietetic Products, Nutrition and Allergies (NDA), “Safety of synthetic trans-resveratrol as a novel food pursuant to Regulation (EC) No 258/97,” *EFSA J.*, vol. 14, no. 1, p. 4368, 2016, doi: 10.2903/j.efsa.2016.4368.
- [6] EFSA Panel on Dietetic Products, Nutrition and Allergies (NDA), “Scientific Opinion on Dietary Reference Values for folate,” *EFSA J.*, vol. 12, no. 11, p. 3893, 2014, doi: 10.2903/j.efsa.2014.3893.
- [7] EFSA Panel on Dietetic Products, Nutrition and Allergies (NDA), “Scientific Opinion on the substantiation of a health claim related to a combination of diosmin, troxerutin and hesperidin and maintenance of normal venous tone pursuant to Article 13(5) of Regulation (EC) No 1924/2006,” *EFSA J.*, vol. 12, no. 1, p. 3512, 2014, doi: 10.2903/j.efsa.2014.3512.
- [8] EFSA Panel on Additives and Products or Substances used in Animal Feed (FEEDAP) *et al.*, “Safety and efficacy of a feed additive consisting of an aqueous extract of Citrus limon (L.) Osbeck (lemon extract) for use in all animal species (Nor-Feed SAS),” *EFSA J.*, vol. 19, no. 11, p. e06893, 2021, doi: 10.2903/j.efsa.2021.6893.
- [9] EFSA Panel on Food Additives and Flavourings (FAF) *et al.*, “Re-evaluation of neohesperidine dihydrochalcone (E 959) as a food additive,” *EFSA J.*, vol. 20, no. 11, p. e07595, 2022, doi: 10.2903/j.efsa.2022.7595.
- [10] EFSA Panel on Food Additives and Nutrient Sources added to Food (ANS) *et al.*, “Scientific opinion on the safety of green tea catechins,” *EFSA J.*, vol. 16, no. 4, p. e05239, 2018, doi: 10.2903/j.efsa.2018.5239.

- [11] EFSA Panel on Dietetic Products, Nutrition and Allergies (NDA), "Scientific Opinion on the Tolerable Upper Intake Level of eicosapentaenoic acid (EPA), docosahexaenoic acid (DHA) and docosapentaenoic acid (DPA)," *EFSA J.*, vol. 10, no. 7, p. 2815, 2012, doi: 10.2903/j.efsa.2012.2815.
- [12] EFSA Panel on Dietetic Products, Nutrition and Allergies (NDA), "Scientific Opinion on the substantiation of a health claim related to alpha linolenic acid and contribution to brain and nerve tissue development pursuant to Article 14 of Regulation (EC) No 1924/2006," *EFSA J.*, vol. 9, no. 4, p. 2130, 2011, doi: 10.2903/j.efsa.2011.2130.
- [13] EFSA Panel on Food Additives and Nutrient Sources added to Food (ANS), "Statement on the safety of  $\beta$ -carotene use in heavy smokers," *EFSA J.*, vol. 10, no. 12, p. 2953, 2012, doi: 10.2903/j.efsa.2012.2953.
- [14] EFSA Panel on Dietetic Products, Nutrition and Allergies (NDA) *et al.*, "Safety of hydroxytyrosol as a novel food pursuant to Regulation (EC) No 258/97," *EFSA J.*, vol. 15, no. 3, p. e04728, 2017, doi: 10.2903/j.efsa.2017.4728.
- [15] M. Bellumori, L. Cecchi, M. Innocenti, M. L. Clodoveo, F. Corbo, and N. Mulinacci, "The EFSA Health Claim on Olive Oil Polyphenols: Acid Hydrolysis Validation and Total Hydroxytyrosol and Tyrosol Determination in Italian Virgin Olive Oils," *Molecules*, vol. 24, no. 11, Art. no. 11, Jan. 2019, doi: 10.3390/molecules24112179.
- [16] EFSA Panel on Dietetic Products, Nutrition and Allergies (NDA), "Scientific Opinion on the substantiation of a health claim related to olive (*Olea europaea* L.) leaf water extract and increase in glucose tolerance pursuant to Article 13(5) of Regulation (EC) No 1924/2006," *EFSA J.*, vol. 12, no. 5, p. 3655, 2014, doi: 10.2903/j.efsa.2014.3655.
- [17] EFSA Panel on Dietetic Products, Nutrition and Allergies (NDA), "Scientific Opinion Part I on the substantiation of health claims related to various food(s)/food constituent(s) not supported by pertinent human data (ID 411, 559, 1174, 1184, 1197, 1380, 1409, 1656, 1667, 1670, 1763, 1767, 1806, 1884, 1908, 1997, 2141, 2159, 2243, 2244, 2325, 2331, 2333, 2336, 2652, 2717, 2727, 2752, 2788, 2861, 2870, 2885, 2894, 3077, 3101, 3516, 3595, 3726, 4252, 4288, 4290, 4406, 4509, 4709) pursuant to Article 13(1) of Regulation (EC) No 1924/2006," *EFSA J.*, vol. 9, no. 6, p. 2246, 2011, doi: 10.2903/j.efsa.2011.2246.
- [18] T. Dodier, K. L. Anderson, J. Bothwell, J. Hermann, E. A. Lucas, and B. J. Smith, "U.S. Montmorency Tart Cherry Juice Decreases Bone Resorption in Women Aged 65–80 Years," *Nutrients*, vol. 13, no. 2, Art. no. 2, Feb. 2021, doi: 10.3390/nu13020544.
- [19] M. J. Ornstrup, T. Harsløf, T. N. Kjær, B. L. Langdahl, and S. B. Pedersen, "Resveratrol Increases Bone Mineral Density and Bone Alkaline Phosphatase in Obese Men: A Randomized Placebo-Controlled Trial," *J. Clin. Endocrinol. Metab.*, vol. 99, no. 12, pp. 4720–4729, Dec. 2014, doi: 10.1210/jc.2014-2799.
- [20] A. Alvarez-Sala *et al.*, "A positive impact on the serum lipid profile and cytokines after the consumption of a plant sterol-enriched beverage with a milk fat globule membrane: a clinical study," *Food Funct.*, vol. 9, no. 10, pp. 5209–5219, Oct. 2018, doi: 10.1039/C8FO00353J.
- [21] M. J. De Souza *et al.*, "Low Dose Daily Prunes Preserve Hip Bone Mineral Density With No Impact on Body Composition in a 12-Month Randomized Controlled Trial in Postmenopausal Women: The Prune Study," *Curr. Dev. Nutr.*, vol. 6, p. 10, Jun. 2022, doi: 10.1093/cdn/nzac047.010.
- [22] C.-L. Shen *et al.*, "Green tea polyphenols supplementation and Tai Chi exercise for postmenopausal osteopenic women: safety and quality of life report," *BMC Complement. Altern. Med.*, vol. 10, no. 1, p. 76, Dec. 2010, doi: 10.1186/1472-6882-10-76.
- [23] J. Wattanathorn, W. Somboonporn, S. Sungkamanee, W. Thukummee, and S. Muchimapura, "A Double-Blind Placebo-Controlled Randomized Trial Evaluating the Effect of Polyphenol-Rich Herbal Congee on Bone Turnover Markers of the Perimenopausal and Menopausal Women," *Oxid. Med. Cell. Longev.*, vol. 2018, p. e2091872, Nov. 2018, doi: 10.1155/2018/2091872.
- [24] M. N. T. Lambert *et al.*, "Combined bioavailable isoflavones and probiotics improve bone status and estrogen metabolism in postmenopausal osteopenic women: a randomized controlled trial," *Am. J. Clin. Nutr.*, vol. 106, no. 3, pp. 909–920, Mar. 2017, doi: 10.3945/ajcn.117.153353.
- [25] L. L. DeBar *et al.*, "YOUTH: A Health Plan-Based Lifestyle Intervention Increases Bone Mineral Density in Adolescent Girls," *Arch. Pediatr. Adolesc. Med.*, vol. 160, no. 12, pp. 1269–1276, Dec. 2006, doi: 10.1001/archpedi.160.12.1269.

- [26] J. W. Pawlowski *et al.*, “Impact of equol-producing capacity and soy-isoflavone profiles of supplements on bone calcium retention in postmenopausal women: a randomized crossover trial<sup>12</sup>,” *Am. J. Clin. Nutr.*, vol. 102, no. 3, pp. 695–703, Sep. 2015, doi: 10.3945/ajcn.114.093906.
- [27] “Clinical outcomes of a 2-y soy isoflavone supplementation in menopausal women,” *Am. J. Clin. Nutr.*, vol. 93, no. 2, pp. 356–367, Feb. 2011, doi: 10.3945/ajcn.110.008359.
- [28] E. Brink, V. Coxam, S. Robins, K. Wahala, A. Cassidy, and F. Branca, “Long-term consumption of isoflavone-enriched foods does not affect bone mineral density, bone metabolism, or hormonal status in early postmenopausal women: a randomized, double-blind, placebo controlled study<sup>2</sup>,” *Am. J. Clin. Nutr.*, vol. 87, no. 3, pp. 761–770, Mar. 2008, doi: 10.1093/ajcn/87.3.761.

**Disclaimer/Publisher’s Note:** The statements, opinions and data contained in all publications are solely those of the individual author(s) and contributor(s) and not of MDPI and/or the editor(s). MDPI and/or the editor(s) disclaim responsibility for any injury to people or property resulting from any ideas, methods, instructions or products referred to in the content.
